# Supplementary material for: PhI(OAc)2-mediated intramolecular oxidative C–N coupling and detosylative aromatization: an access to indolo[2,3-b]quinolines
Source: Royal Society of Chemistry journal article supplement (doi:10.1039/d1ra01894a), 2021-01-01

*Supporting Information*

**PhI(OAc)<sub>2</sub>-Mediated Intramolecular Oxidative C-N Coupling and  
Detosylative Aromatization: an Access to Indolo[2,3-*b*]quinolines**

Quan-Bing Wang †, Shi Tang † \*, Ying-Jie Wang, Yue Yuan, Tieqiao Chen and Ai-Qun Jia\*

E-mail: tangshi705@163.com

E-mail: ajia@hainanu.edu.cn

**Contents**

|                                                                     |   |
|---------------------------------------------------------------------|---|
| I. Preparation of Starting Materials .....                          | 1 |
| II. Optimization of the Reaction Conditions .....                   | 2 |
| III. Copies of <sup>1</sup> H and <sup>13</sup> C NMR Spectra ..... | 5 |

## I. Preparation of Starting Materials

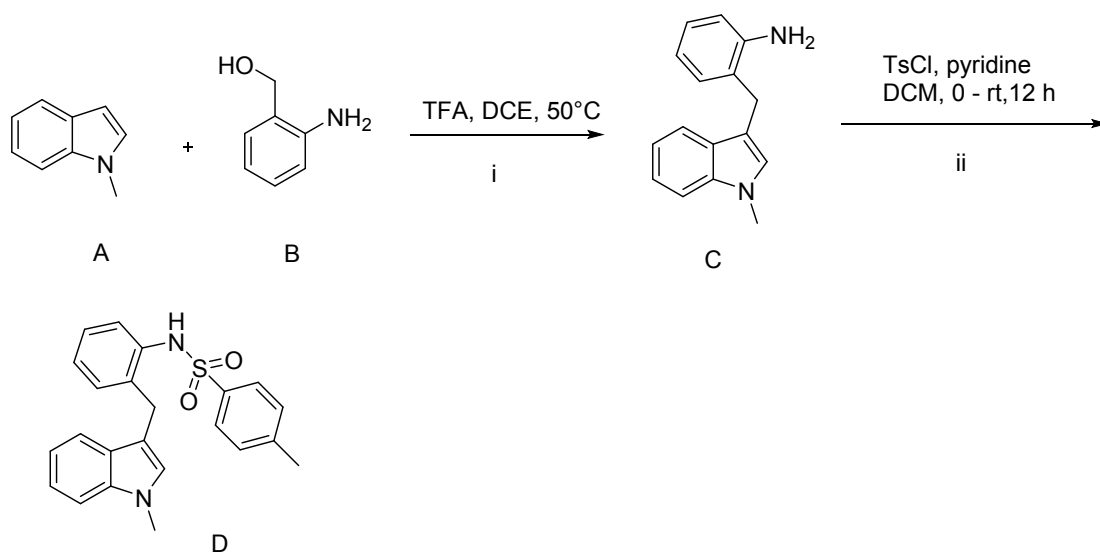

(i) To a solution of A (1.0 equiv) and (2-aminophenyl)-methanol B (2.0 equiv) in DCE was added TFA (30 mol%) at room temperature. The resulting solution was stirred at 50 °C for 12 h. After the reaction was completed (monitored by TLC), the reaction was quenched with saturated aqueous NaHCO<sub>3</sub>, then diluted with DCM and washed with brine. The organic phase was dried over Na<sub>2</sub>SO<sub>4</sub>, filtered and concentrated. The residue was purified by flash chromatography (petroleum ether/ethyl acetate = 5/1) to afford the desired product C.

(ii) The intermediate C (1.0 equiv) was dissolved in dry DCM and the solution was cooled to 0 °C. Pyridine (1.3 equiv) and TsCl (1.2 equiv) were then added dropwise. The reaction mixture was warmed to room temperature and stirred at this temperature for 12 h until TLC analysis showed a complete consumption of the starting material. HCl (1 N) was added and the organic layer was washed with water. The aqueous layer was extracted with DCM. The combined organic layer was dried over anhydrous Na<sub>2</sub>SO<sub>4</sub>, filtered and concentrated. The residue was purified by flash chromatography (petroleum ether/ethyl acetate = 5/1) to afford the desired product D.

## II. Optimization of the Reaction Conditions<sup>a</sup>

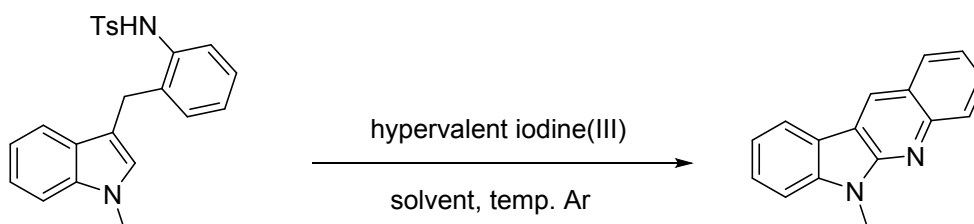

| Entry           | Oxidant | Solvent           | Temp. (°C) | Additive                        | Yield (%) <sup>b</sup> |
|-----------------|---------|-------------------|------------|---------------------------------|------------------------|
| 1               | PIDA    | DCM               | rt         | -                               | 10                     |
| 2               | PIFA    | DCM               | rt         | -                               | trace                  |
| 3               | PIDA    | DCE               | rt         | -                               | 22                     |
| 4               | PIDA    | THF               | rt         | -                               | 28                     |
| 5               | PIDA    | dioxane           | rt         | -                               | 19                     |
| 6               | PIDA    | PhCF <sub>3</sub> | rt         | -                               | 16                     |
| 7               | PIDA    | TFE               | rt         | -                               | 51                     |
| 8               | PIDA    | HFIP              | rt         | -                               | 67                     |
| 9               | PIDA    | HFIP              | 0          | -                               | 15                     |
| 10 <sup>c</sup> | PIDA    | HFIP              | rt         | -                               | 43                     |
| 11              | PIDA    | HFIP              | 0 - rt     | -                               | 82                     |
| 12 <sup>d</sup> | PIDA    | HFIP              | 0 - rt     | CS <sub>2</sub> CO <sub>3</sub> | 73                     |

<sup>a</sup>Reaction condition: 1a (0.2 mmol), Oxidant (0.24 mmol), in Ar, solvent (2 mL) was added at rt and stirred for 12 h. <sup>b</sup>Isolated yield in parentheses <sup>c</sup> PIDA was 4.0 mmol. <sup>d</sup>CS<sub>2</sub>CO<sub>3</sub> is 0.24 mmol.

### Screening of protecting group R <sup>a</sup>

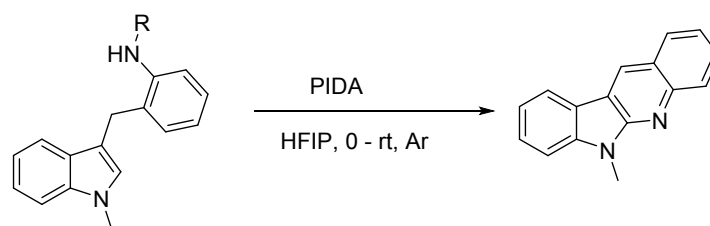

| Entry | Oxidant | Solvent | Temp. (°C) | R                       | Yield (%) <sup>b</sup> |
|-------|---------|---------|------------|-------------------------|------------------------|
| 13    | PIDA    | HFIP    | 0 - rt     | benzenesulfonyl         | 73                     |
| 14    | PIDA    | HFIP    | 0 - rt     | 4-chlorobenzenesulfonyl | 86                     |
| 15    | PIDA    | HFIP    | 0 - rt     | 4-fluorobenzenesulfonyl | 75                     |
| 16    | PIDA    | HFIP    | 0 - rt     | methylsulfonyl          | 74                     |
| 17    | PIDA    | HFIP    | 0 - rt     | acetyl                  | trace                  |

<sup>a</sup>Reaction condition: 1 (0.2 mmol), PIDA (0.24 mmol), in Ar, HFIP (2 mL) was added at 0 °C, then temperature was increased to rt stirred for 12 h. <sup>b</sup>Isolated yield in parentheses.

### Screening of oxidant and solvent <sup>a</sup>

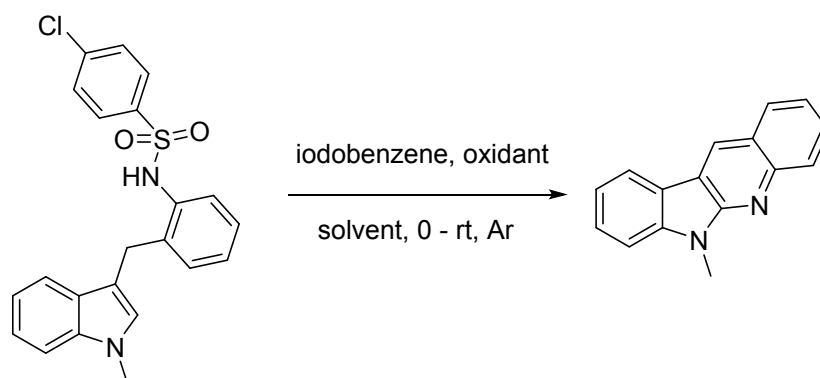

| Entry | Oxidant                       | Solvent                            | Temp. (°C) | Additive | Yield (%) <sup>b</sup> |
|-------|-------------------------------|------------------------------------|------------|----------|------------------------|
| 18    | H <sub>2</sub> O <sub>2</sub> | DCM                                | 0 - rt     | -        | --                     |
| 29    | <i>m</i> -CPBA                | DCM                                | 0 - rt     | -        | --                     |
| 20    | <i>m</i> -CPBA                | CF <sub>3</sub> CH <sub>2</sub> OH | 0 - rt     | -        | 23                     |
| 21    | <i>m</i> -CPBA                | HFIP                               | 0 - rt     | -        | 25                     |

<sup>a</sup>Reaction condition: 1 (0.2 mmol), iodobenzene (0.06 mmol), oxidant (0.24 mmol) in Ar, solvent (2 mL) was added at 0 °C, then temperature was increased to rt and stirred for 12 h. <sup>b</sup>Isolated yield in parentheses.

### III. Copies of $^1\text{H}$ and $^{13}\text{C}$ NMR Spectra

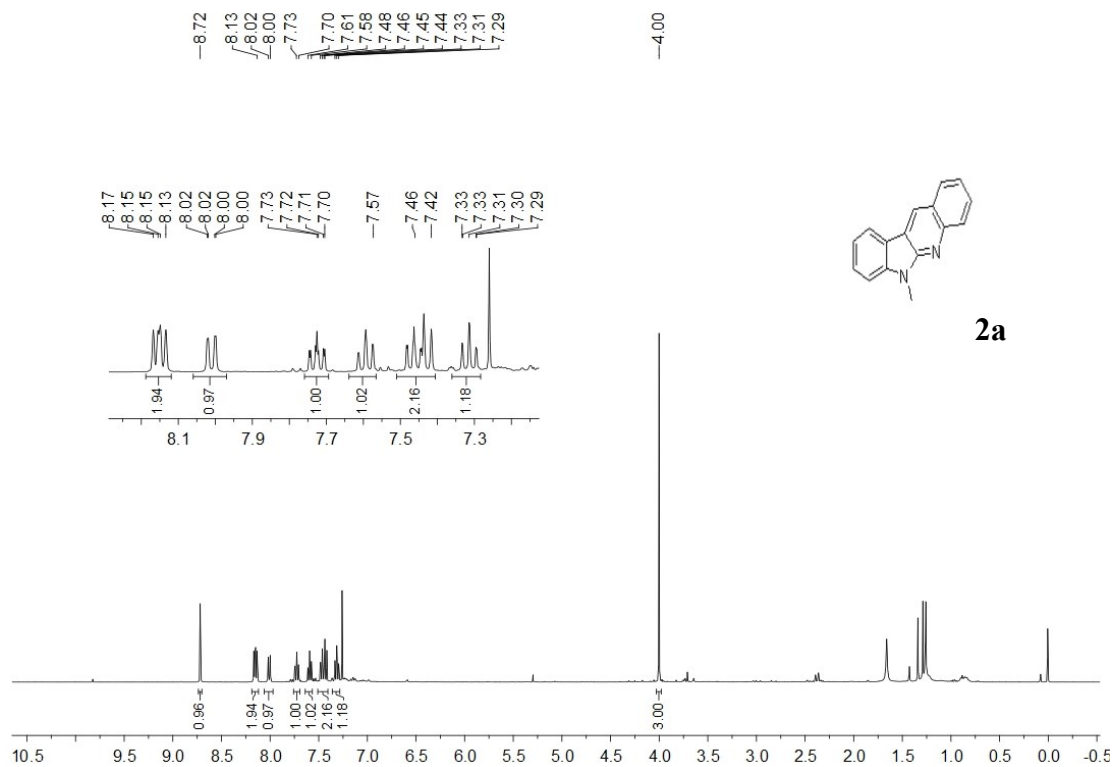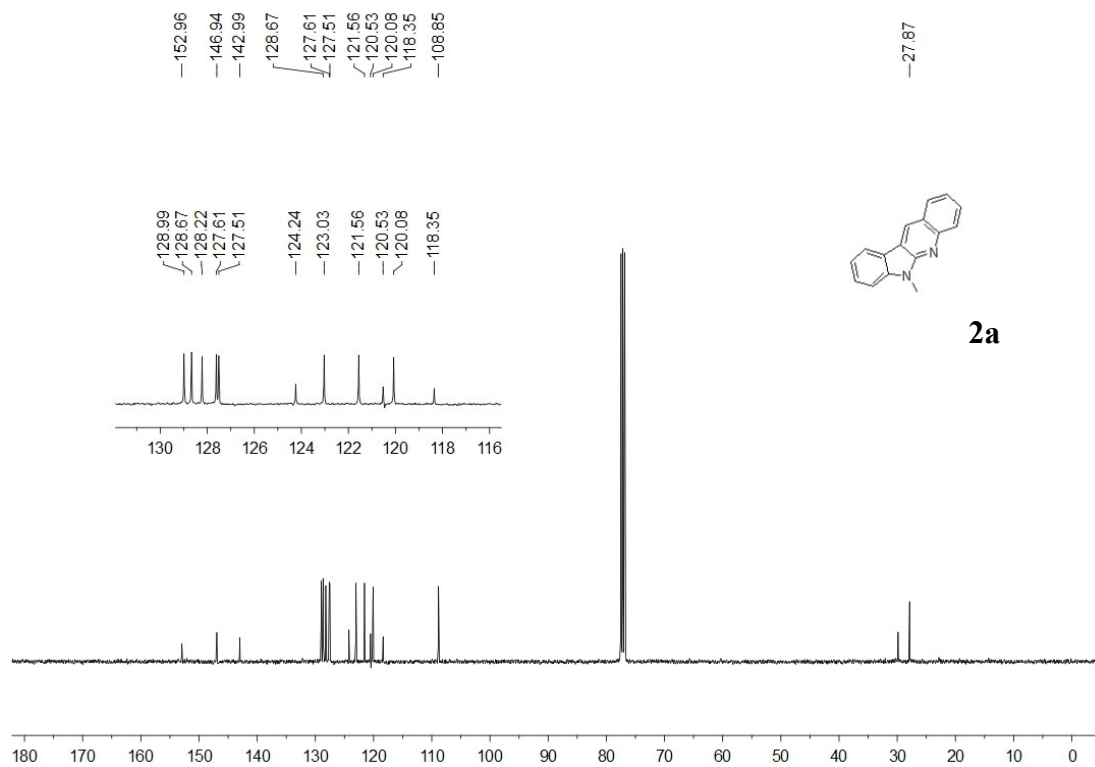

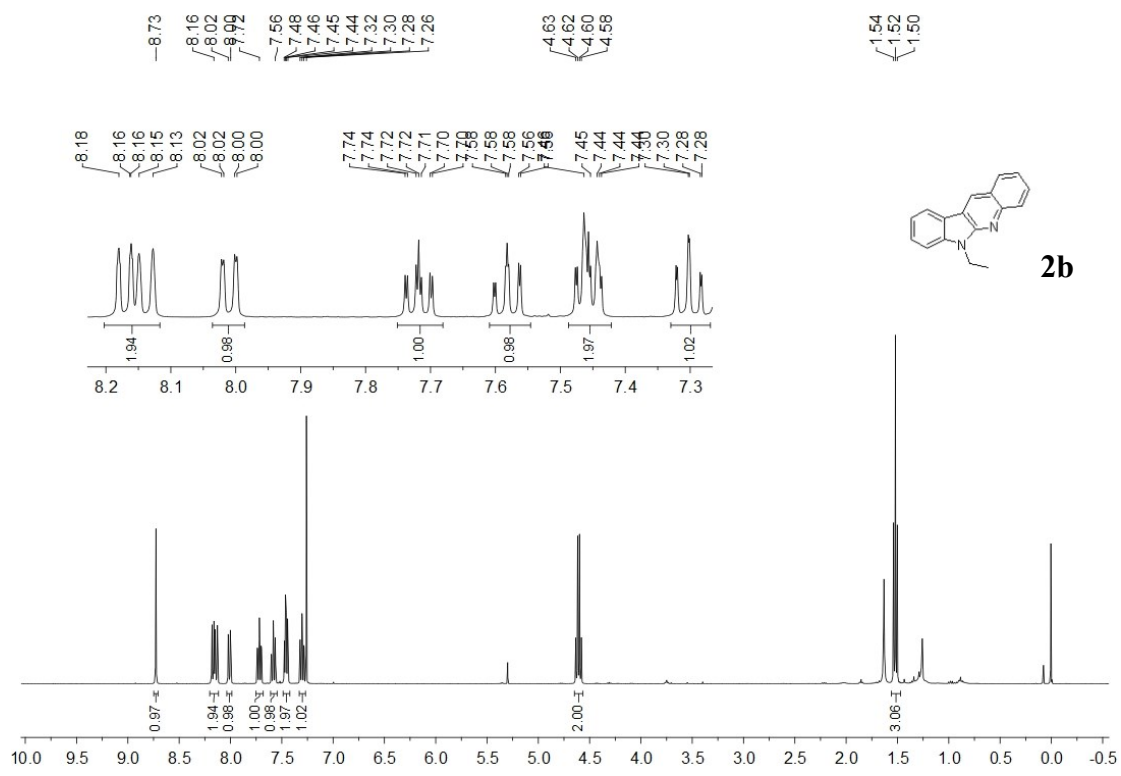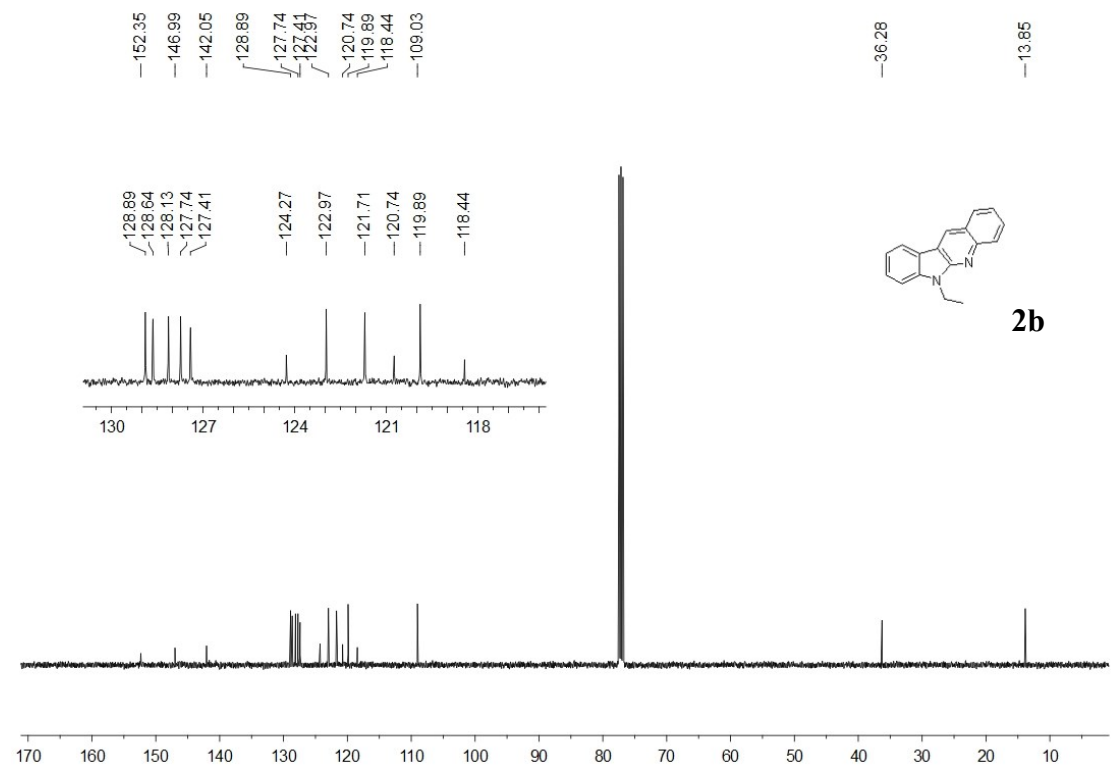

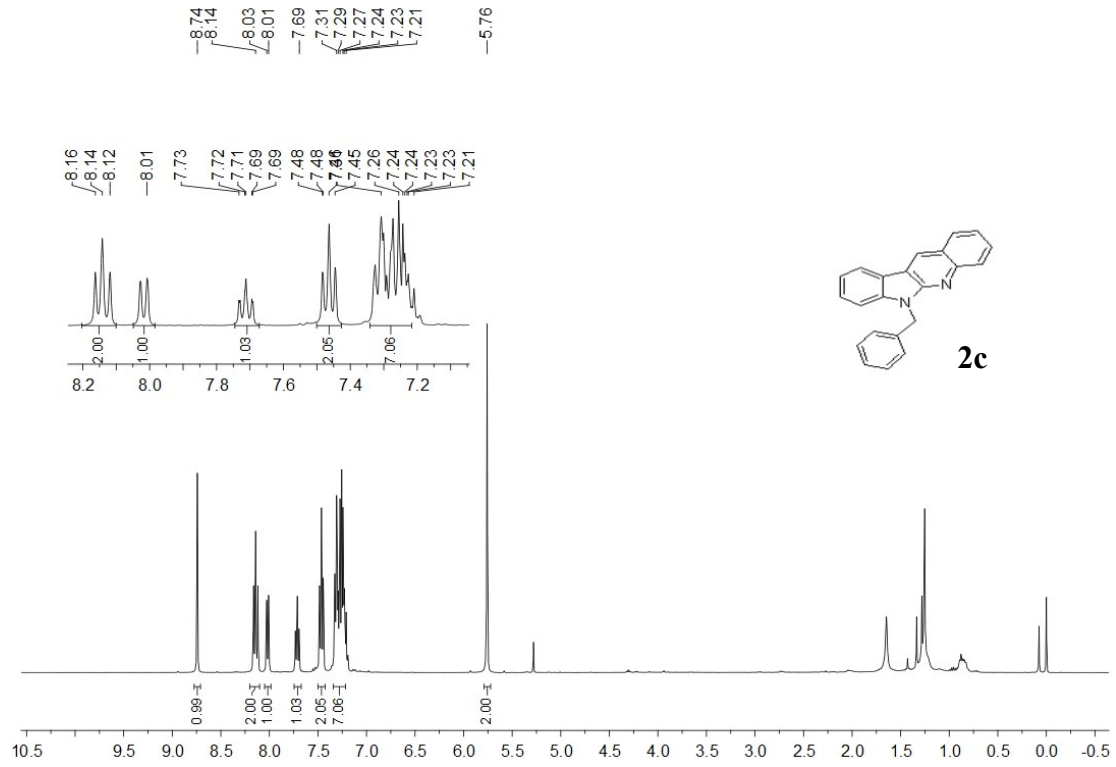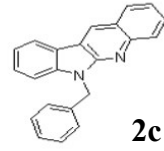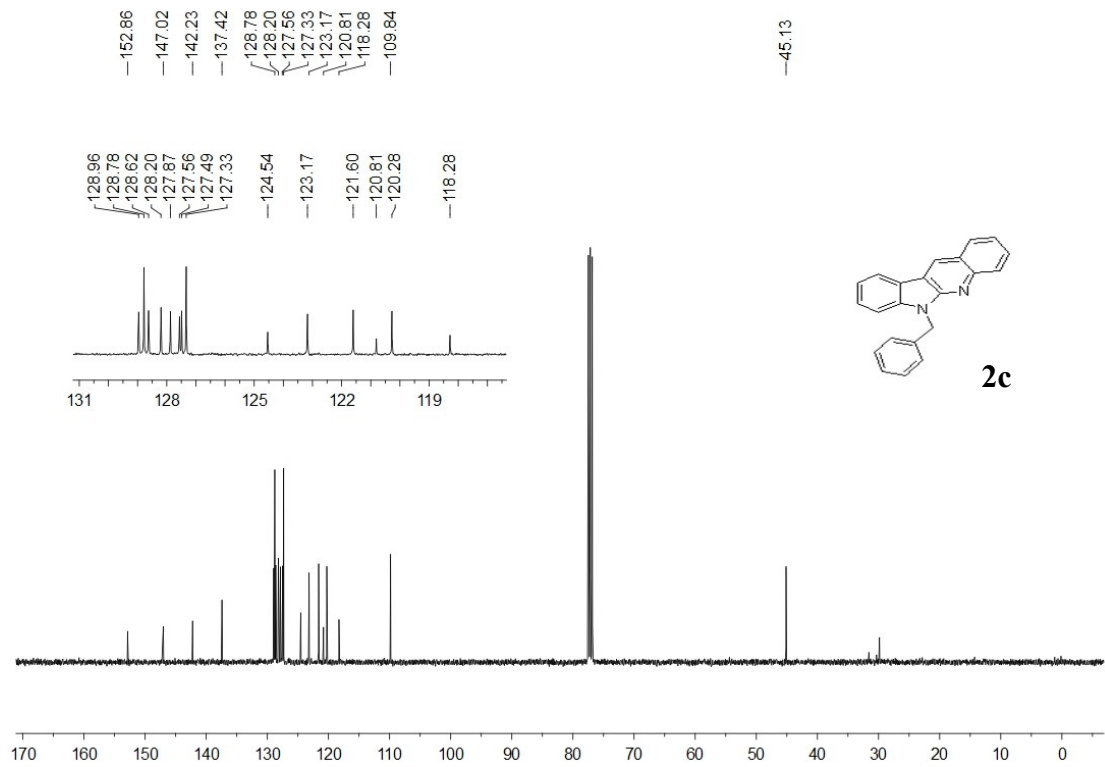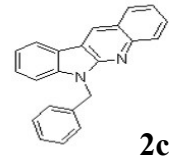



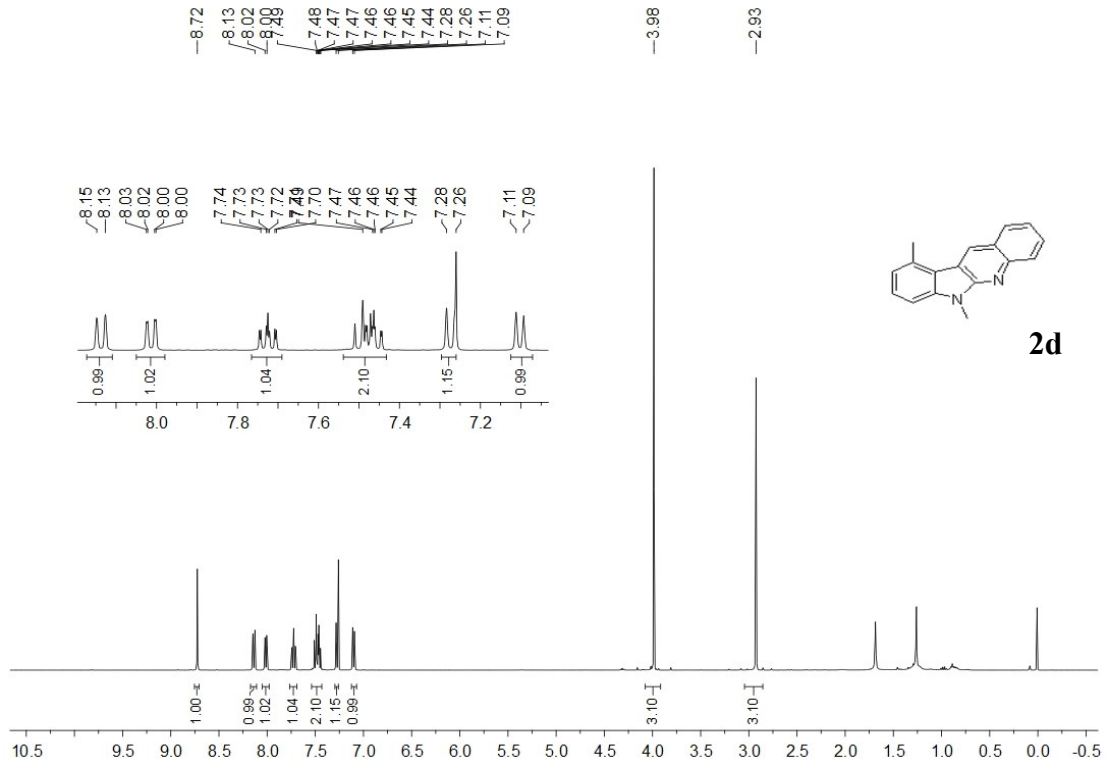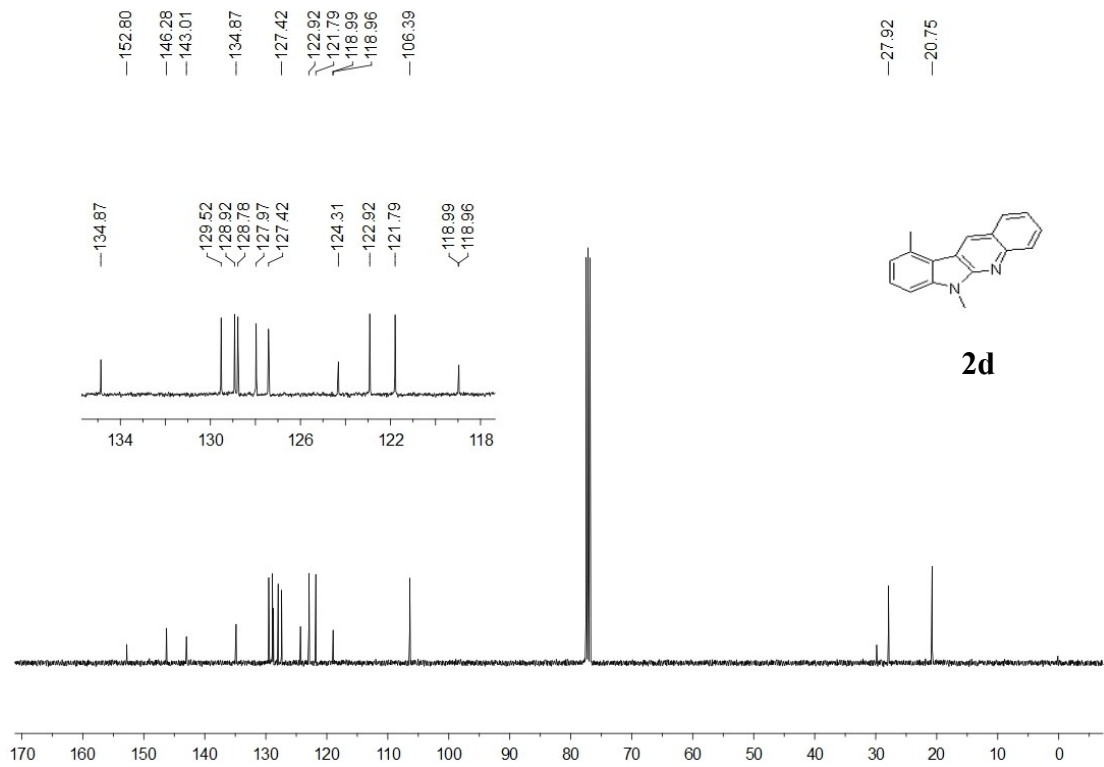

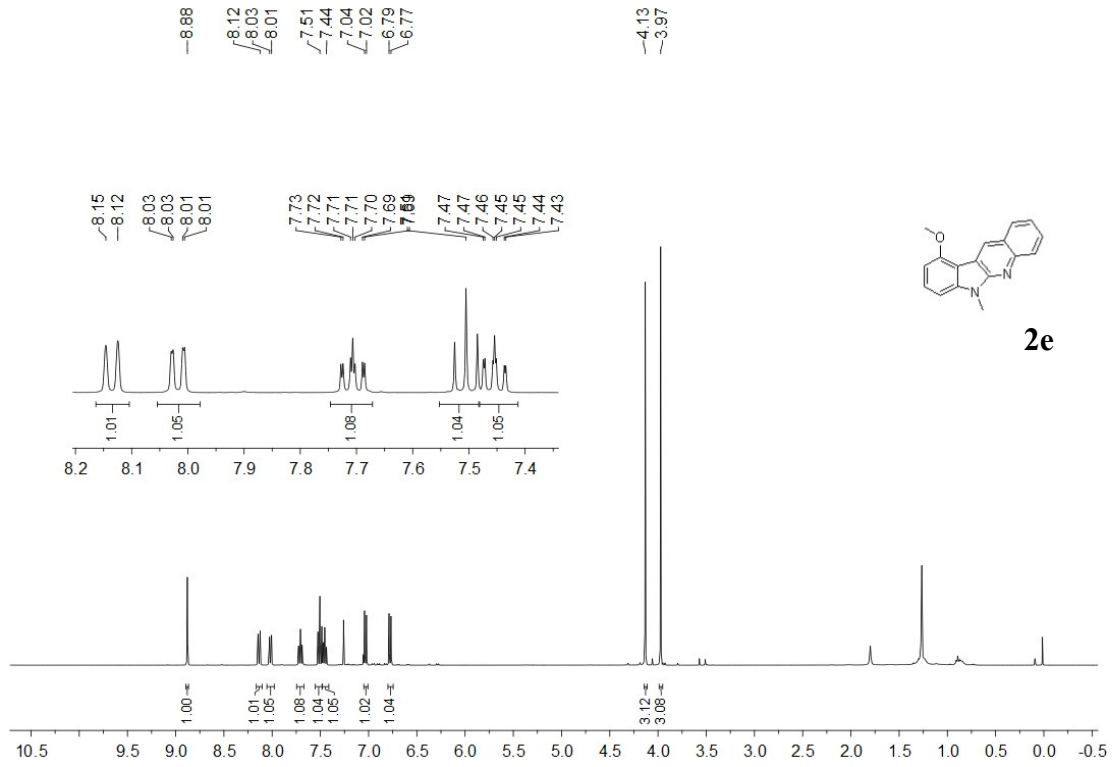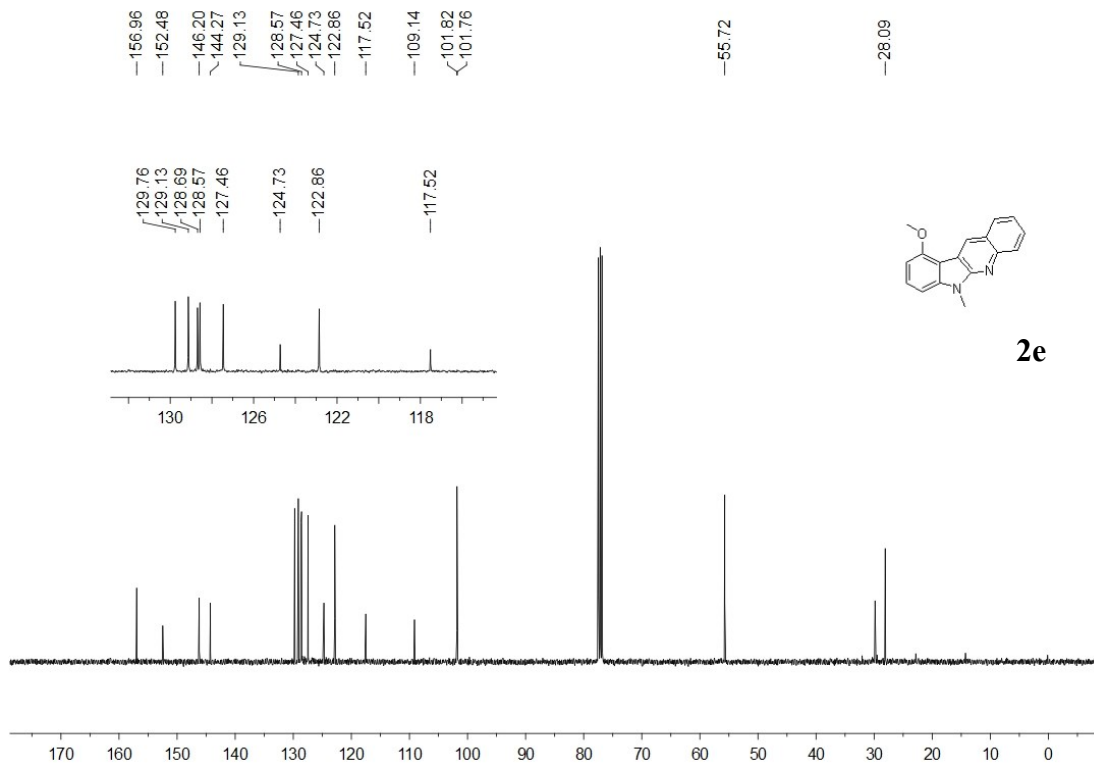

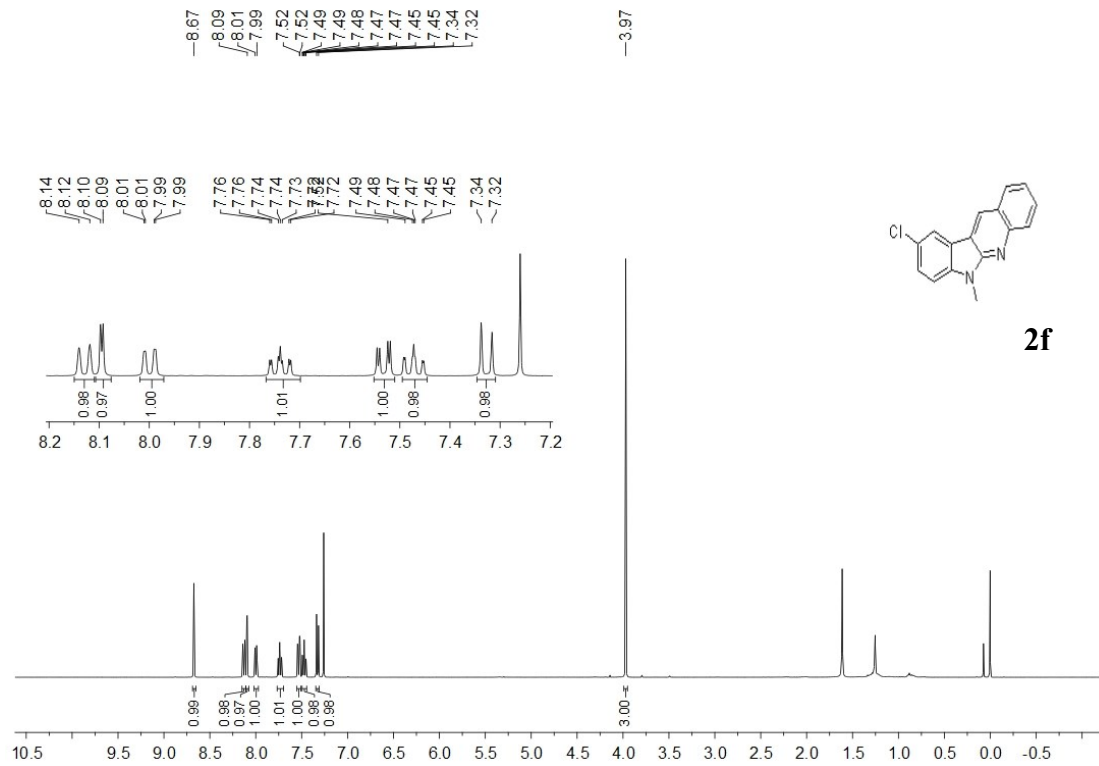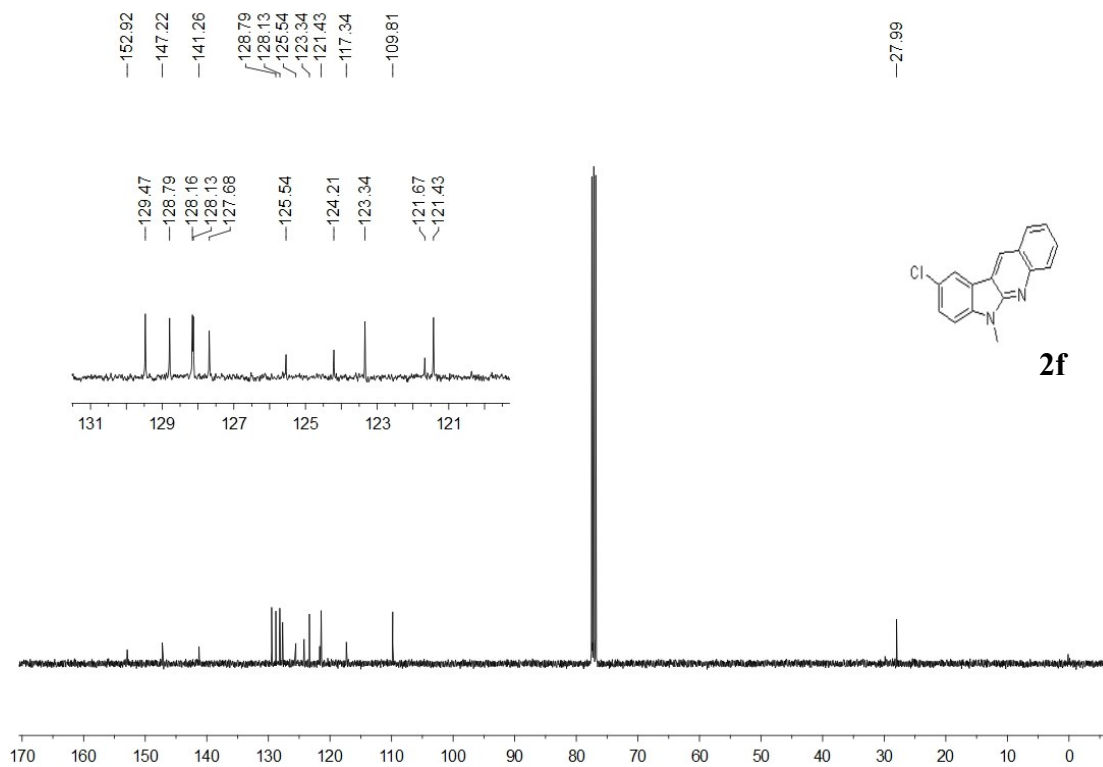

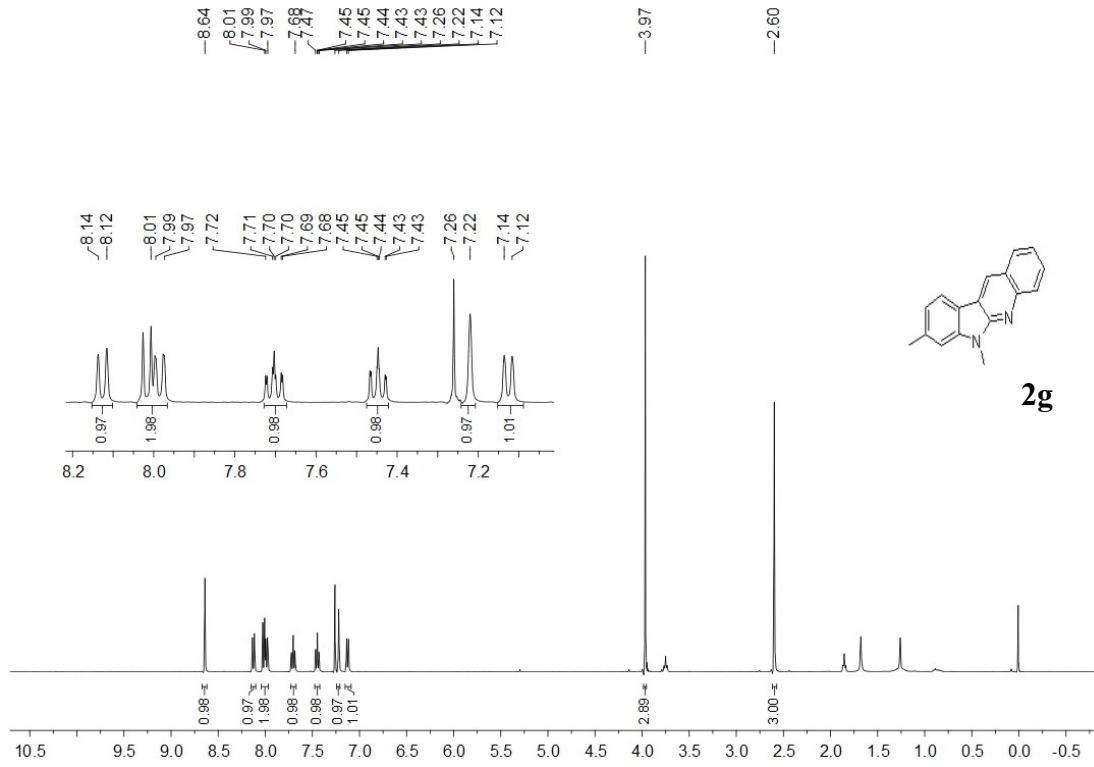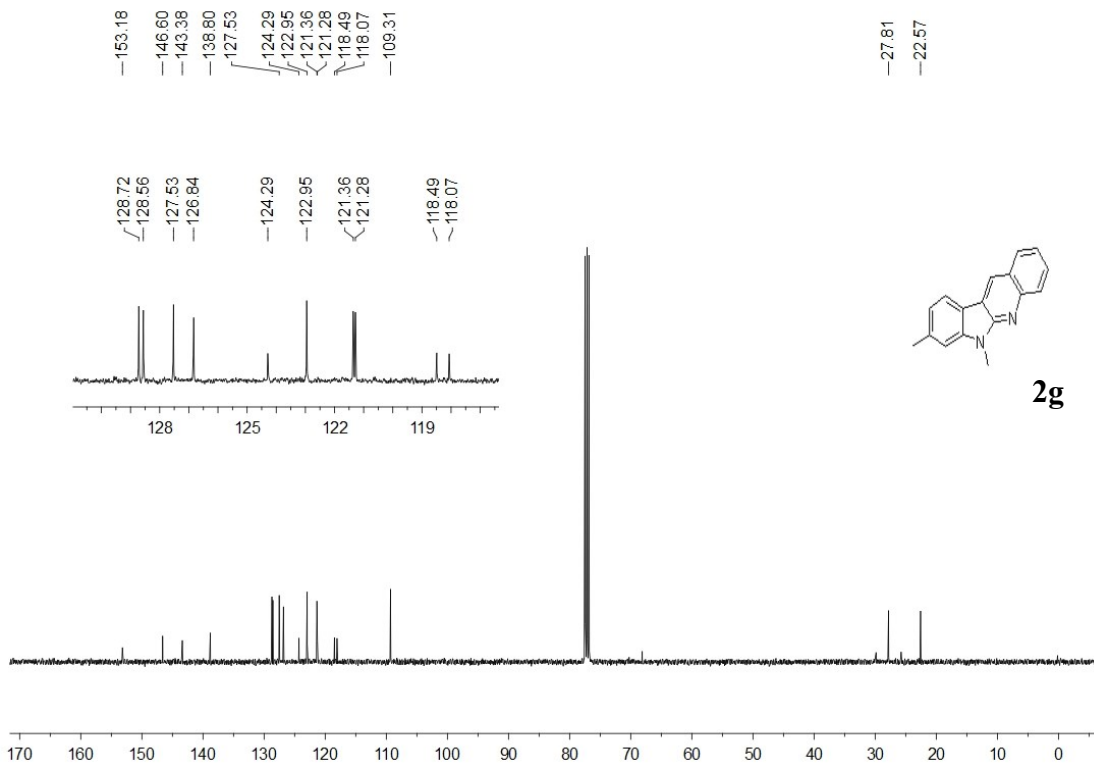

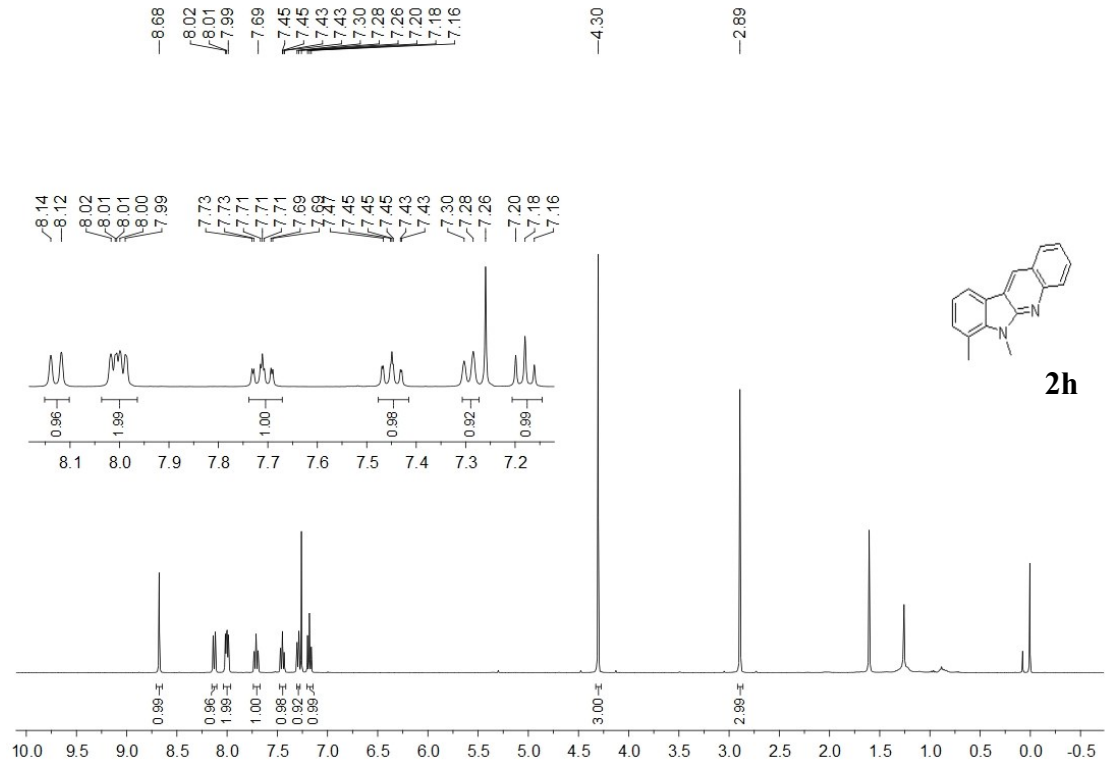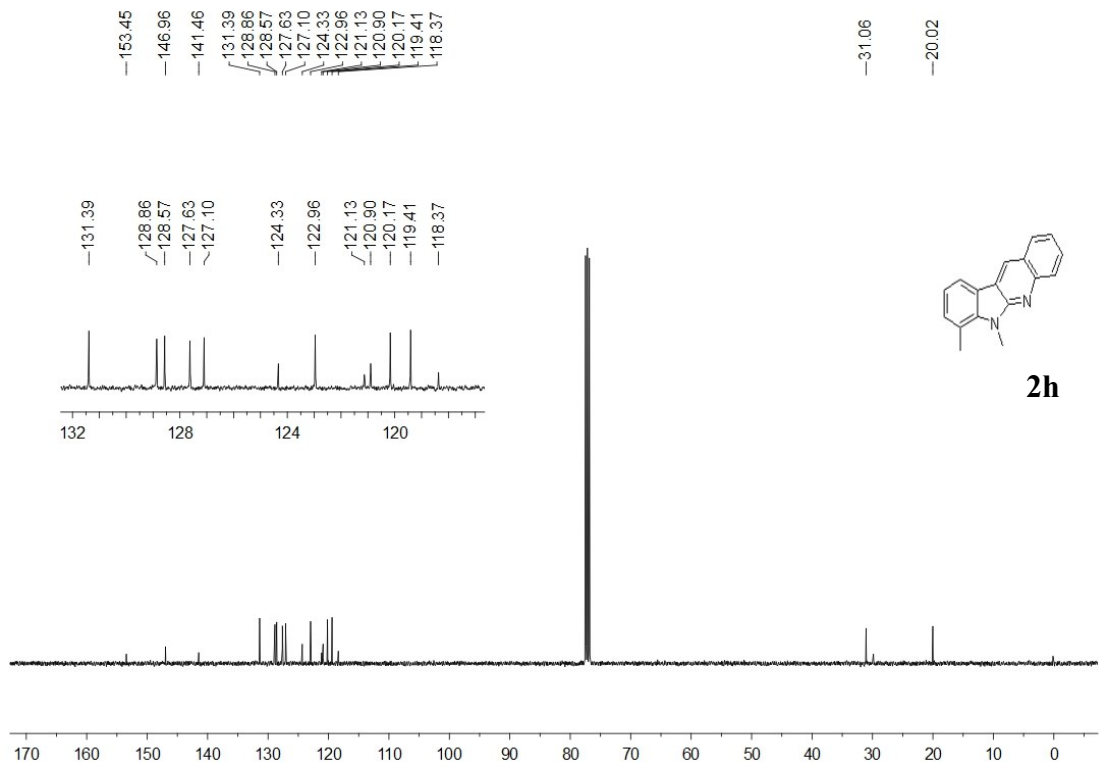

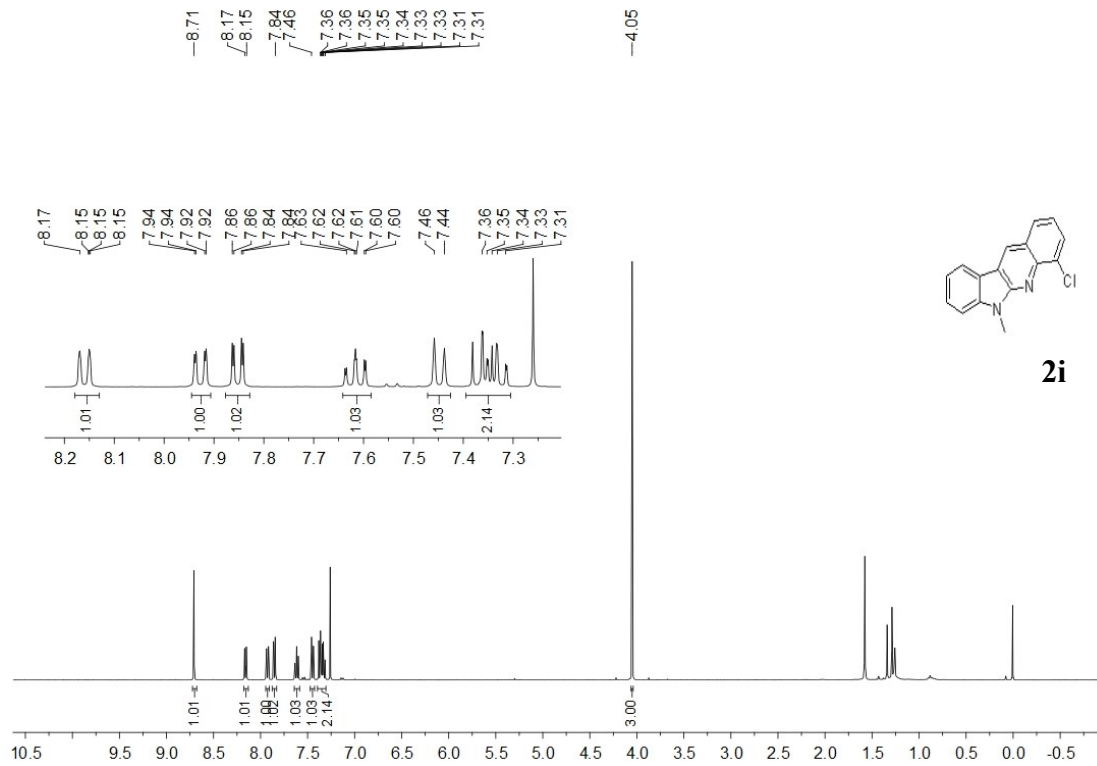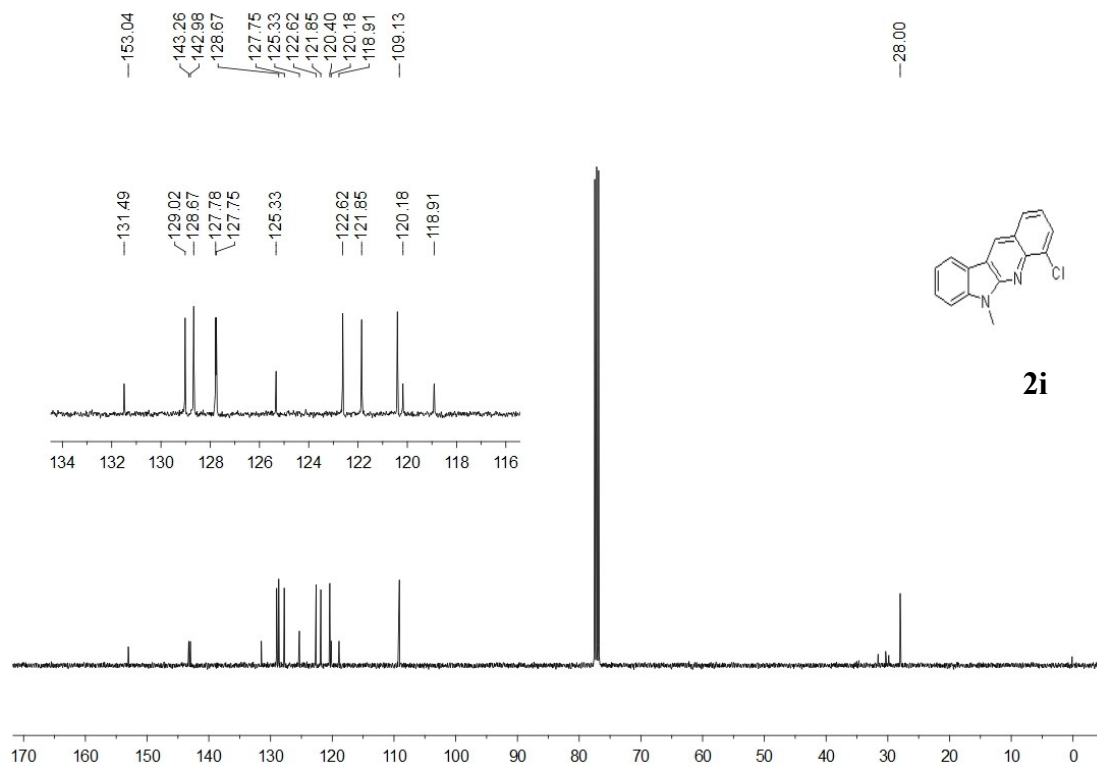

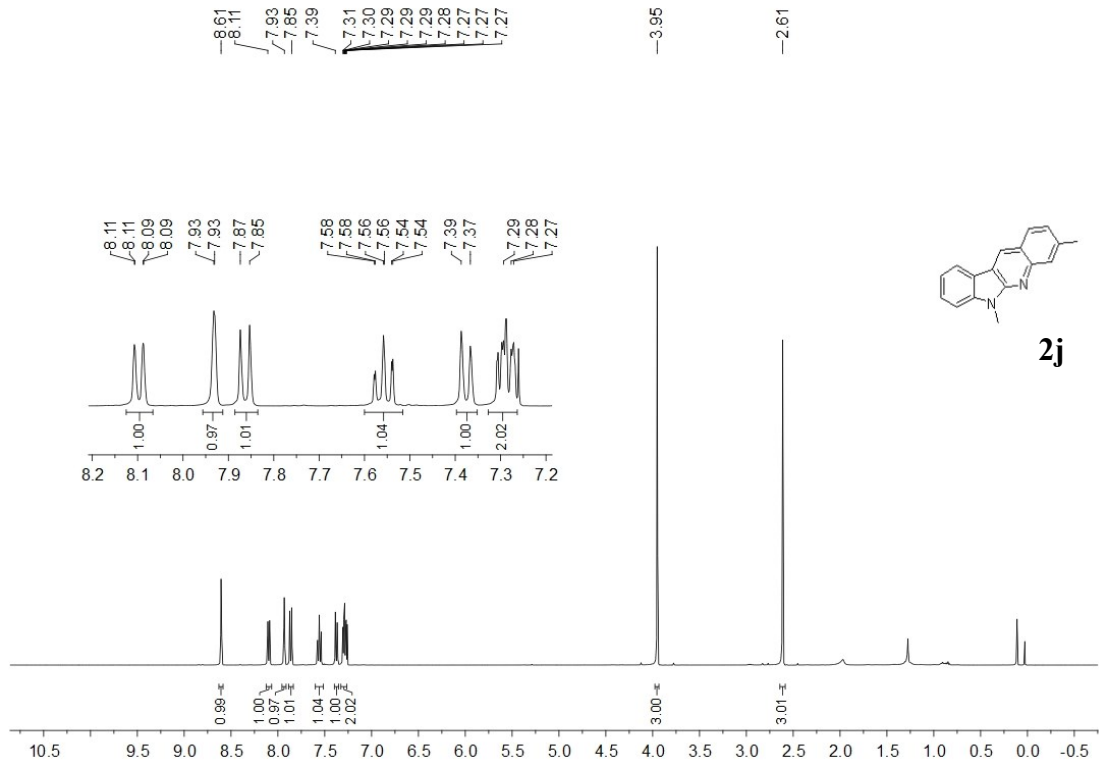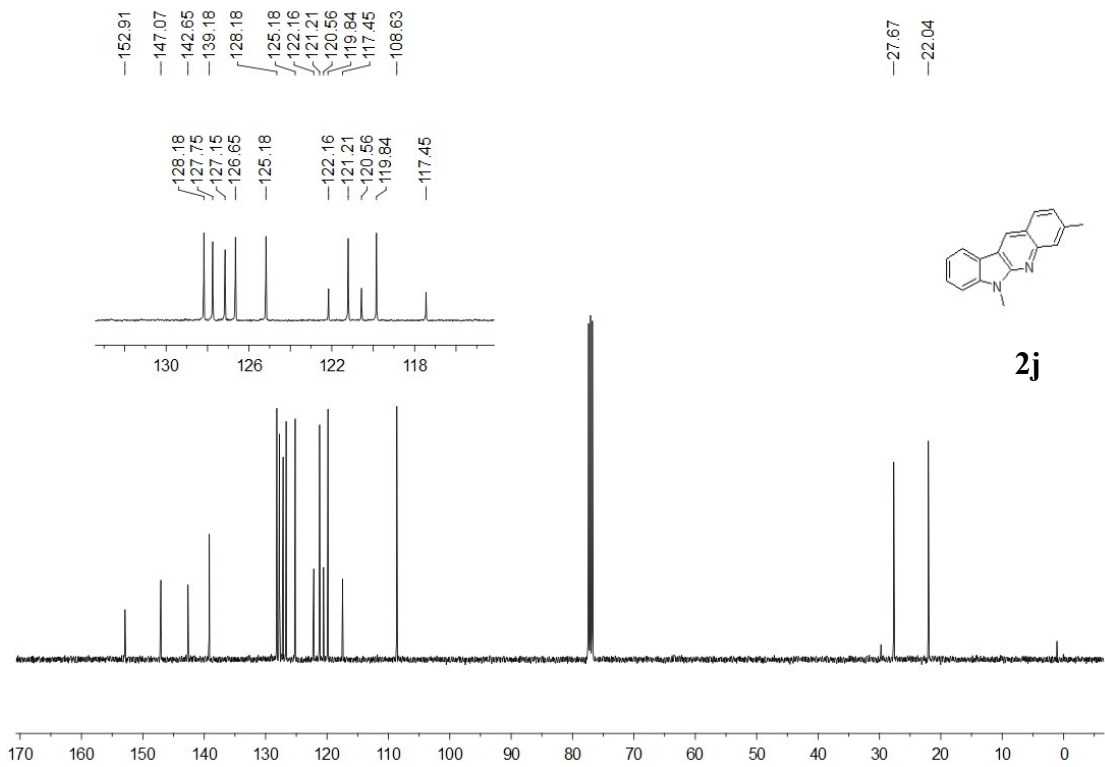

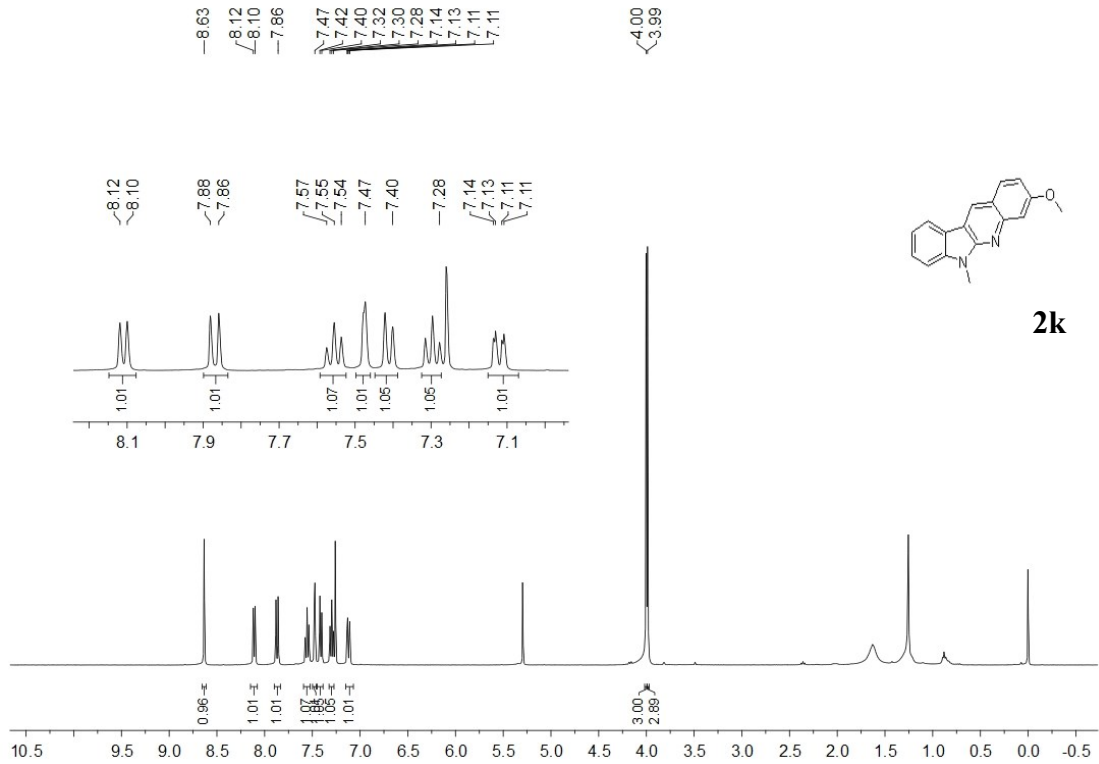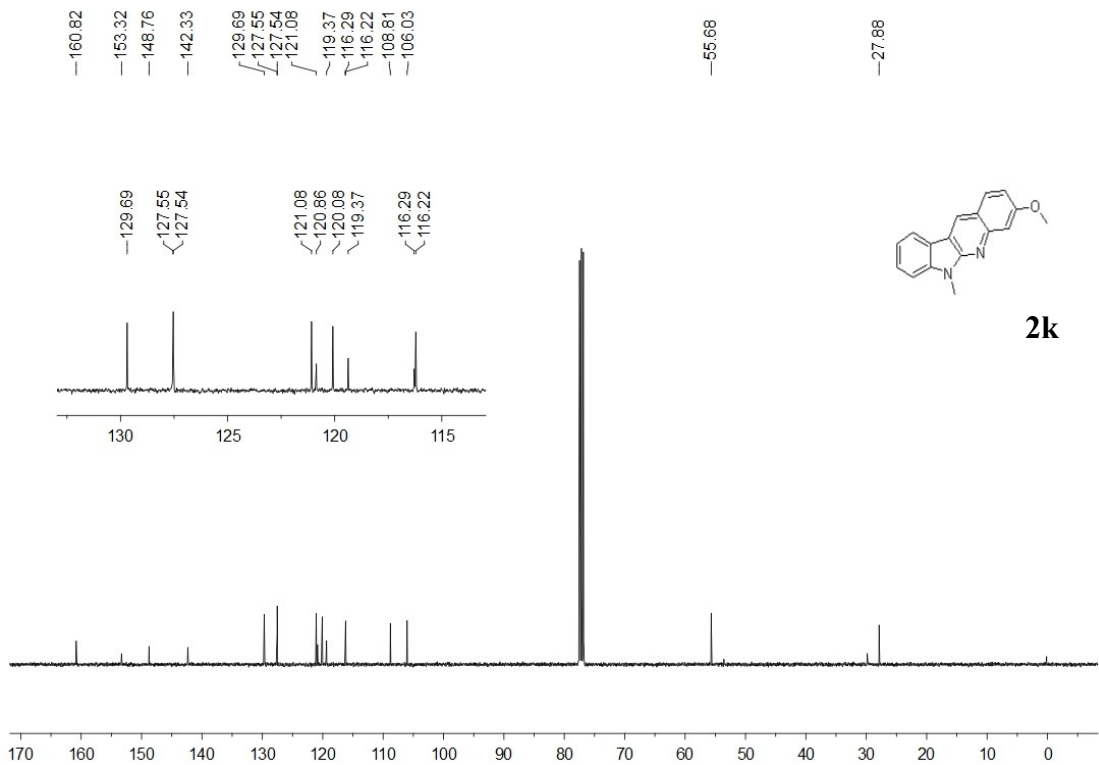



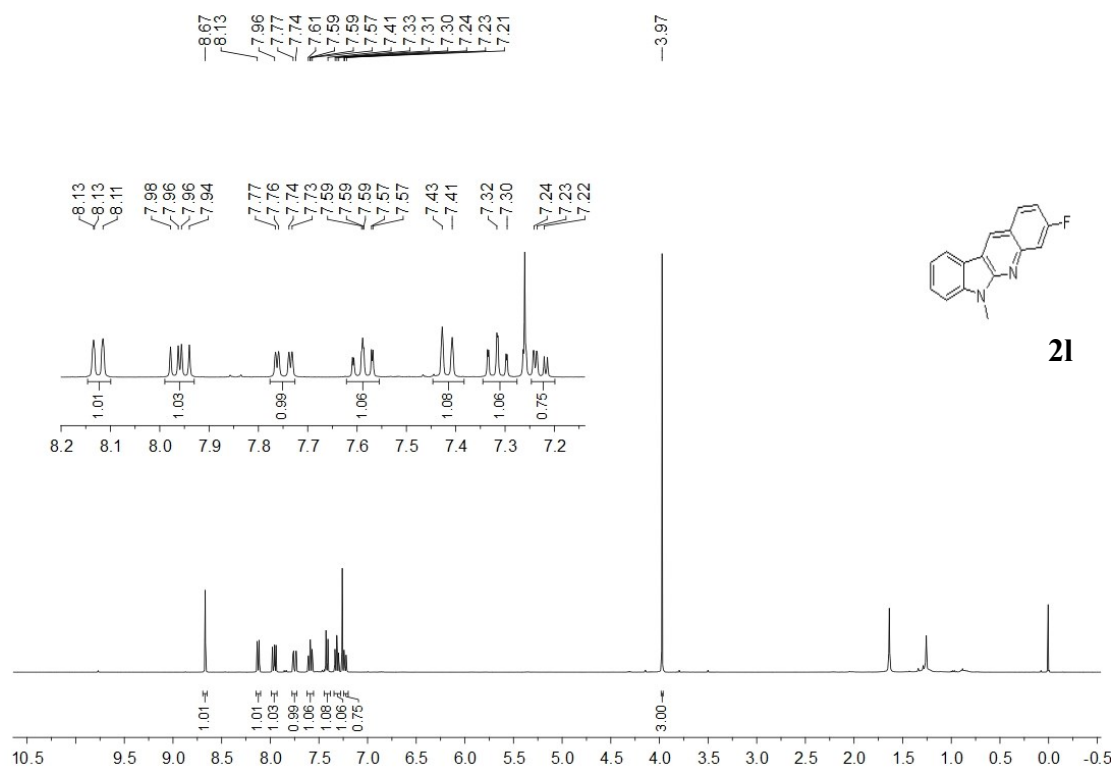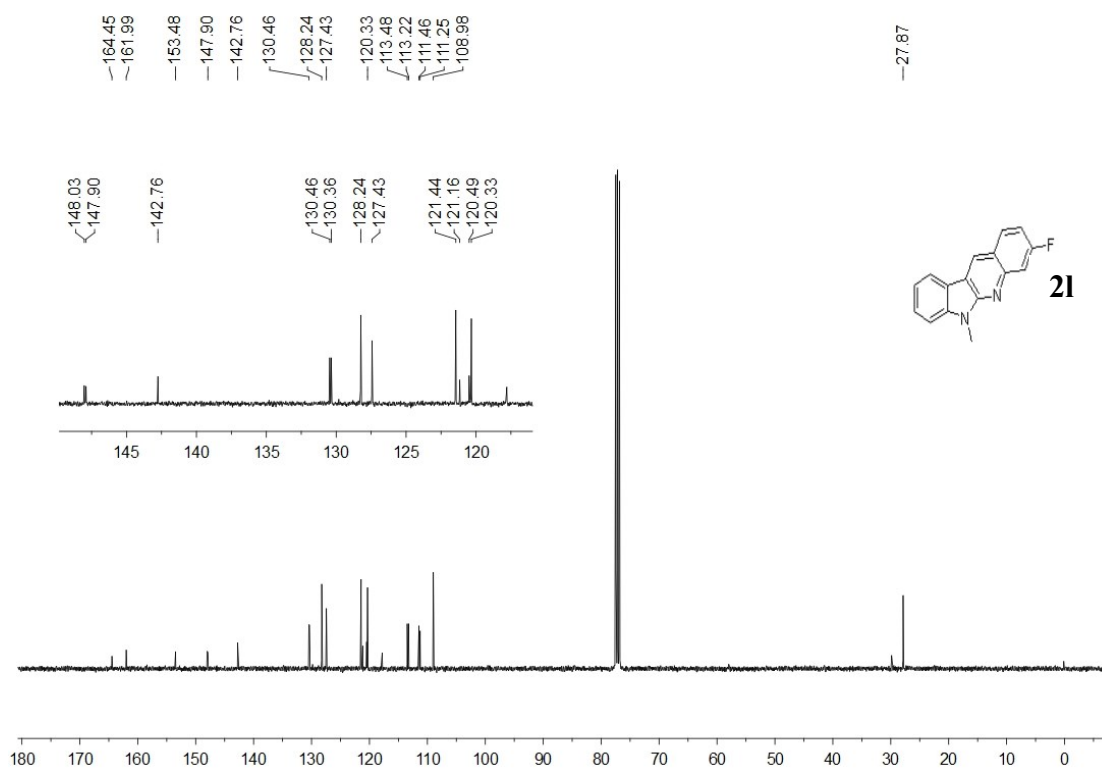

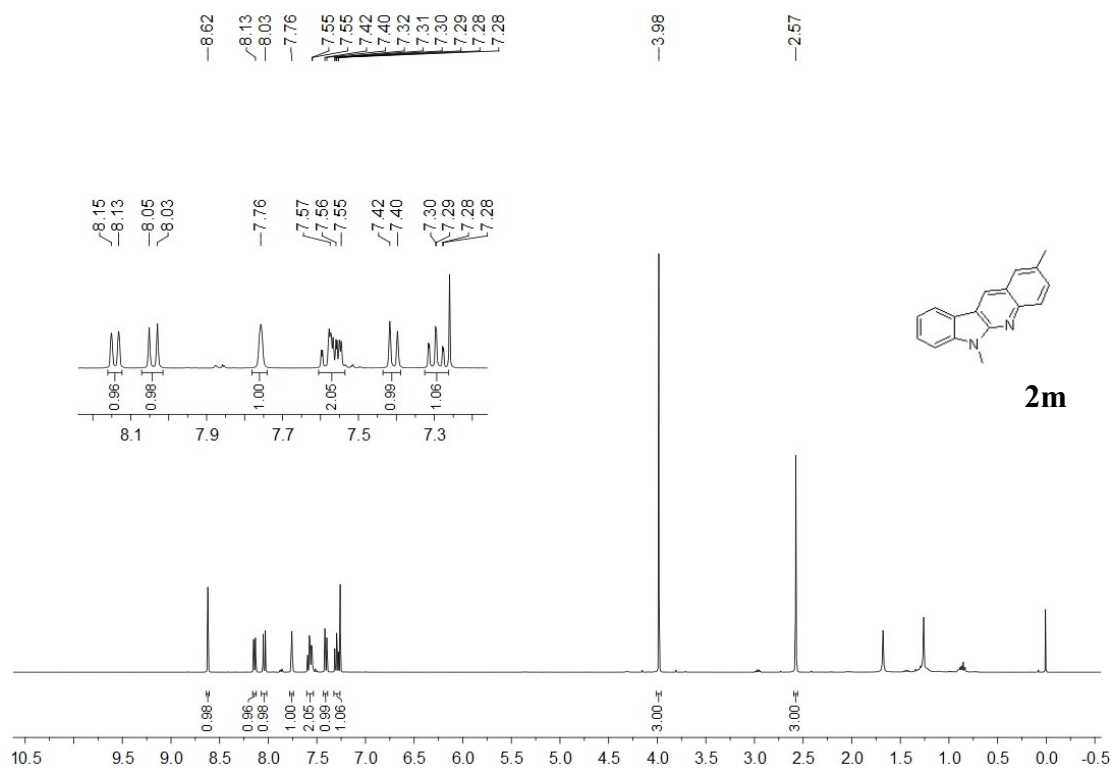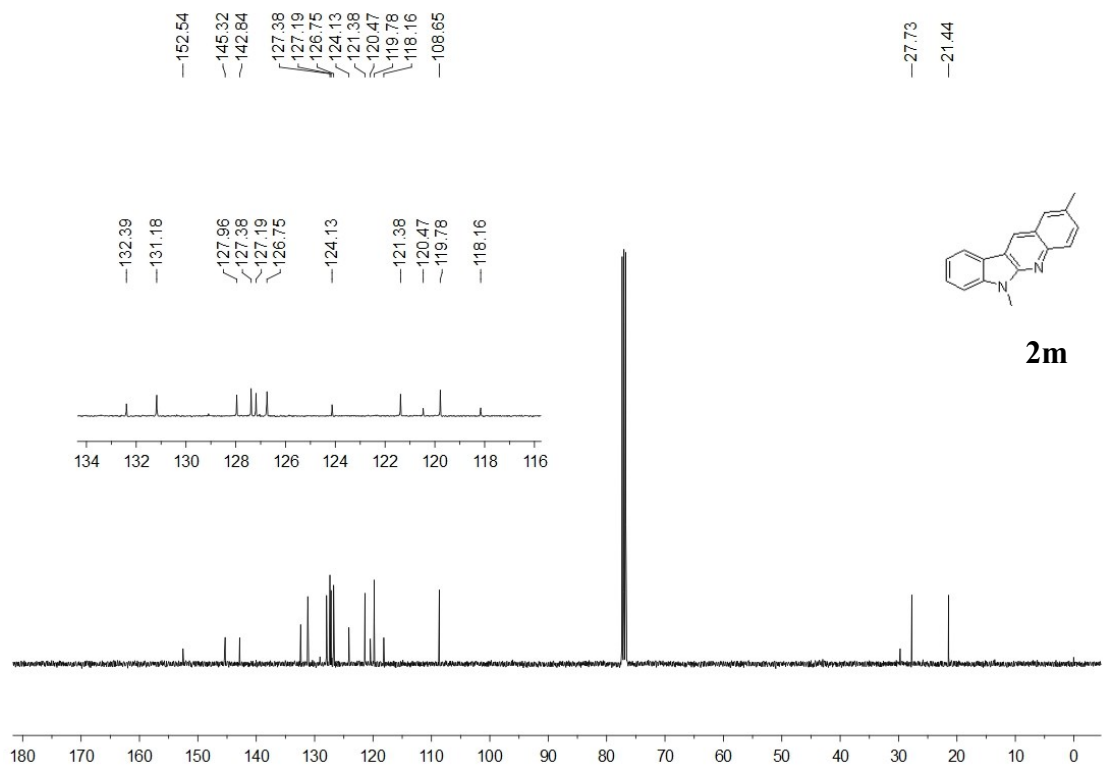

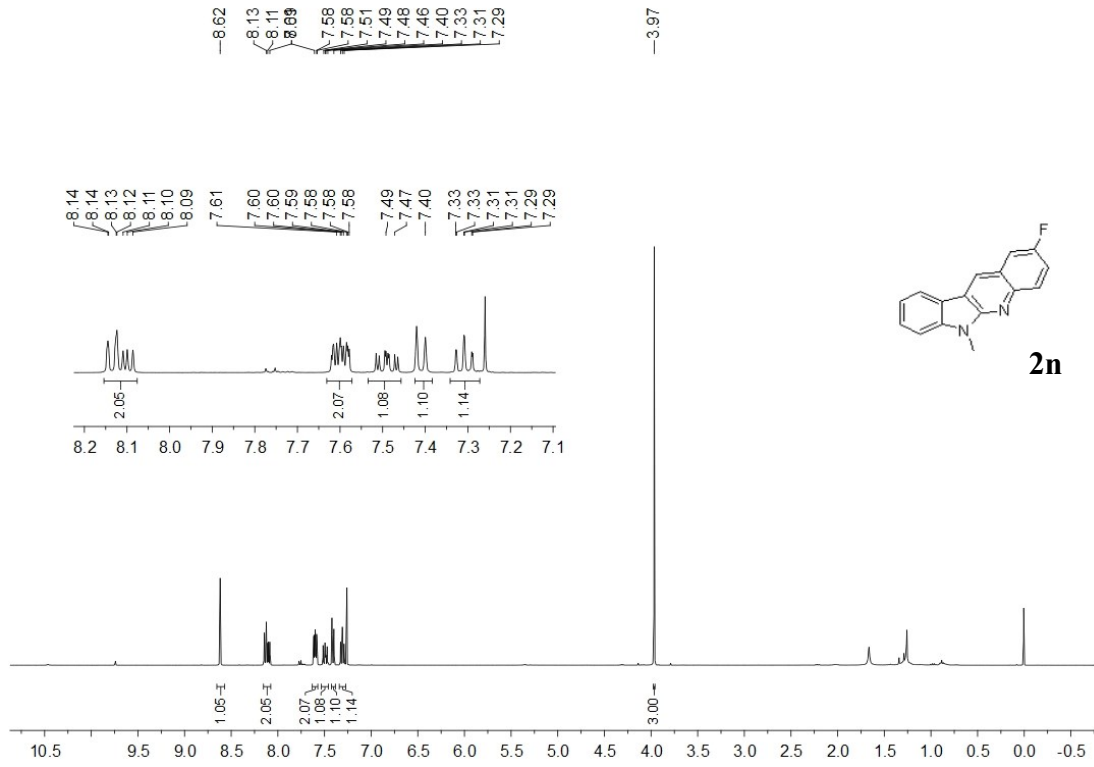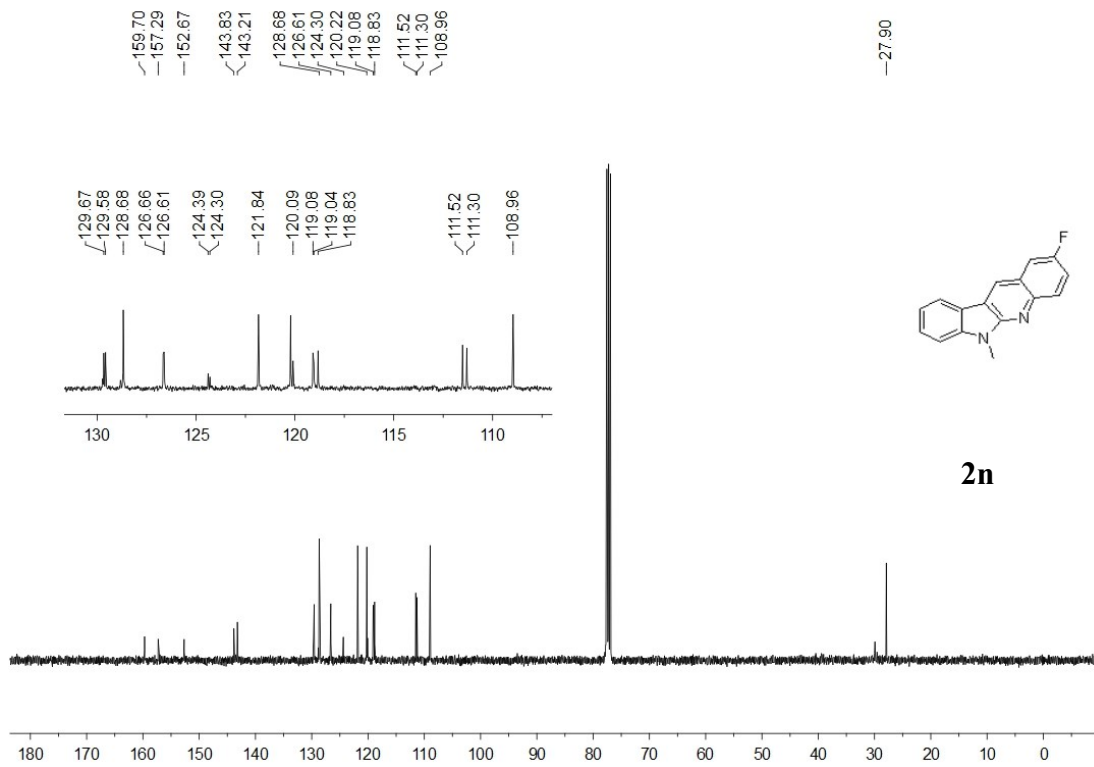

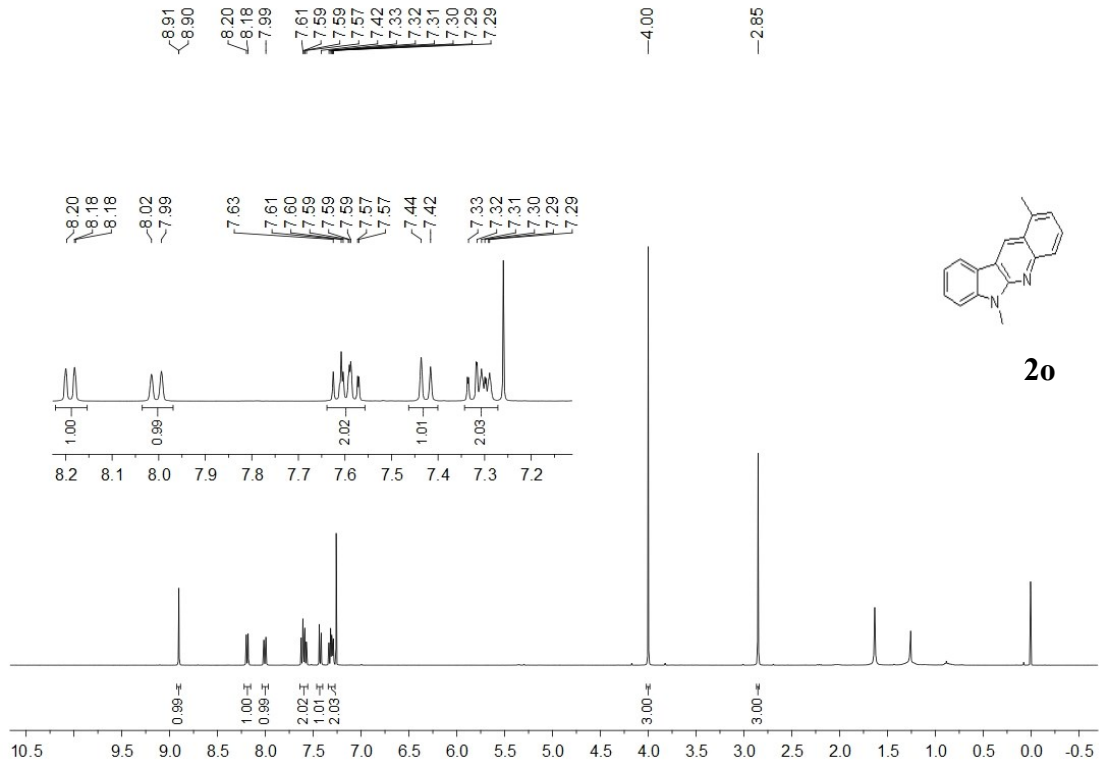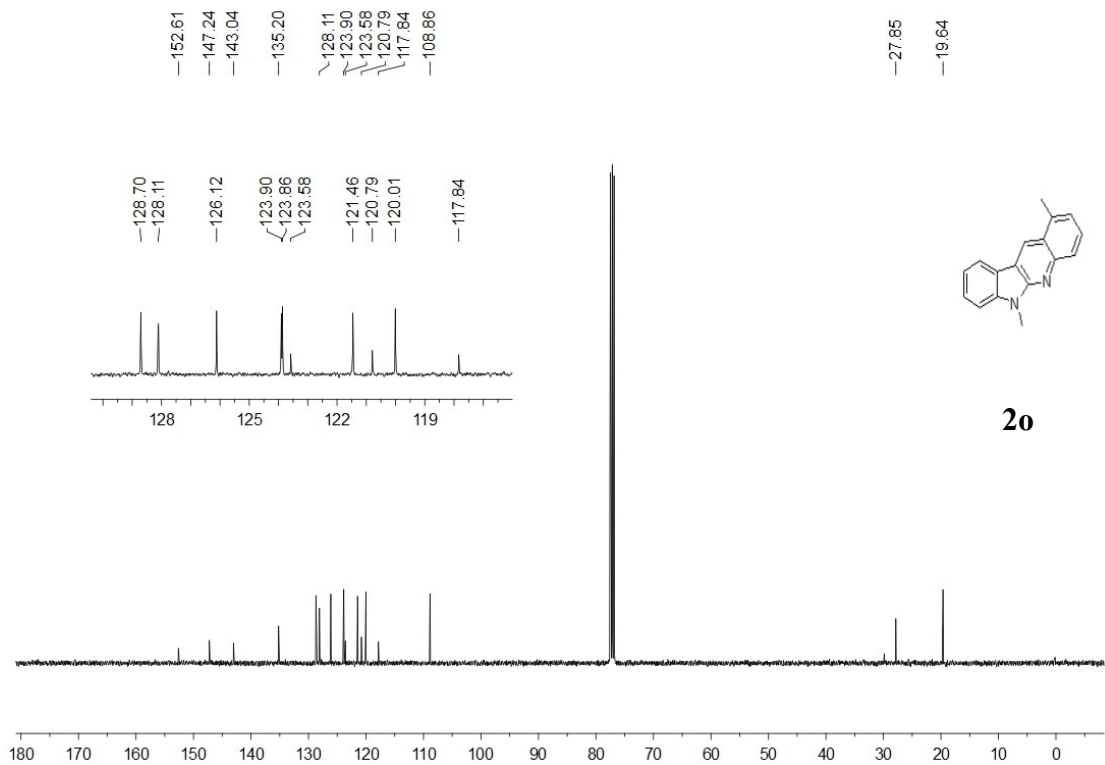

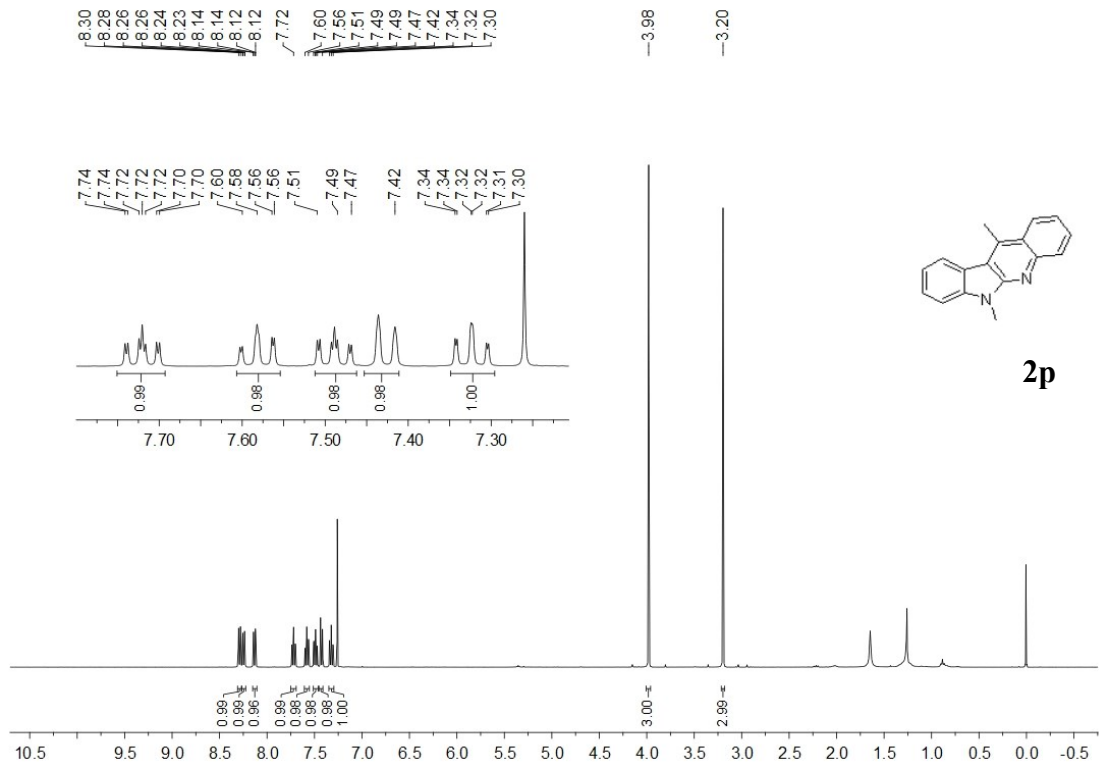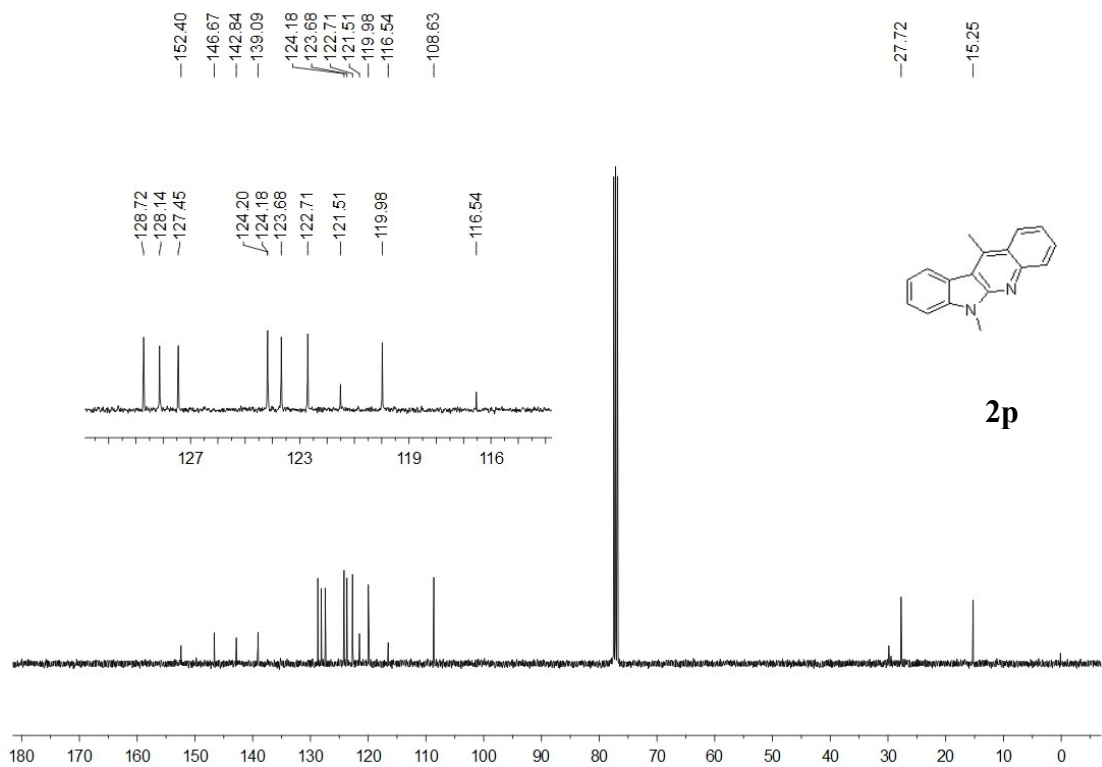

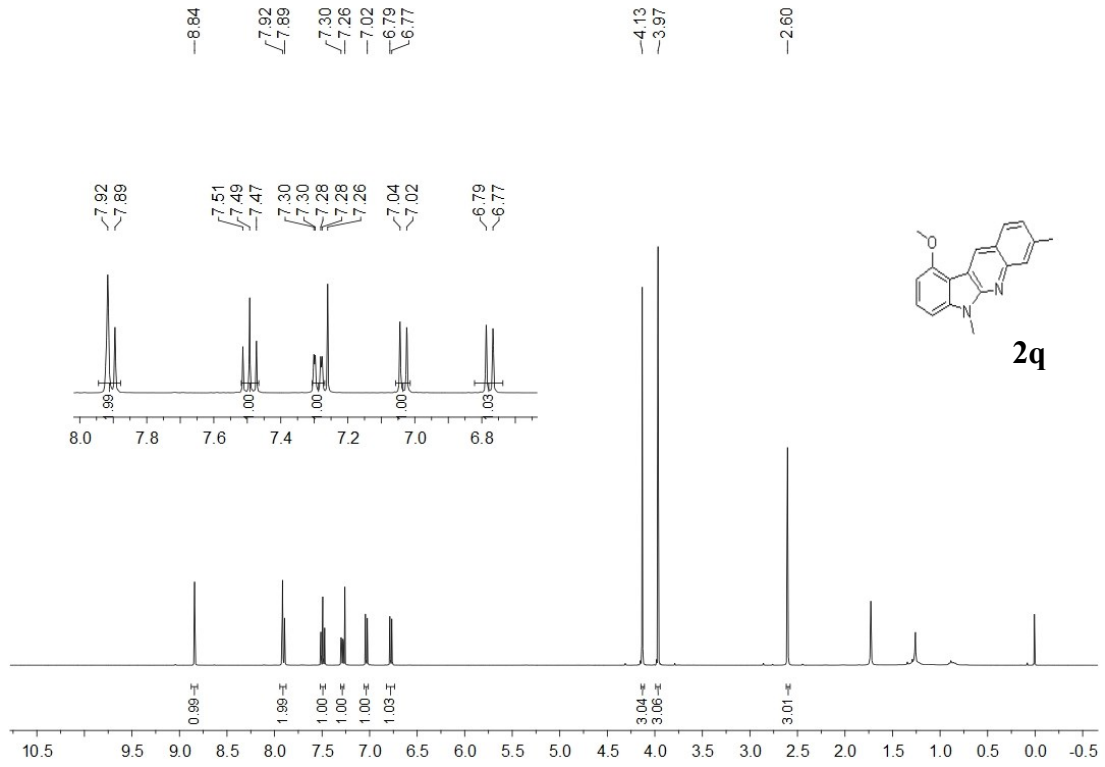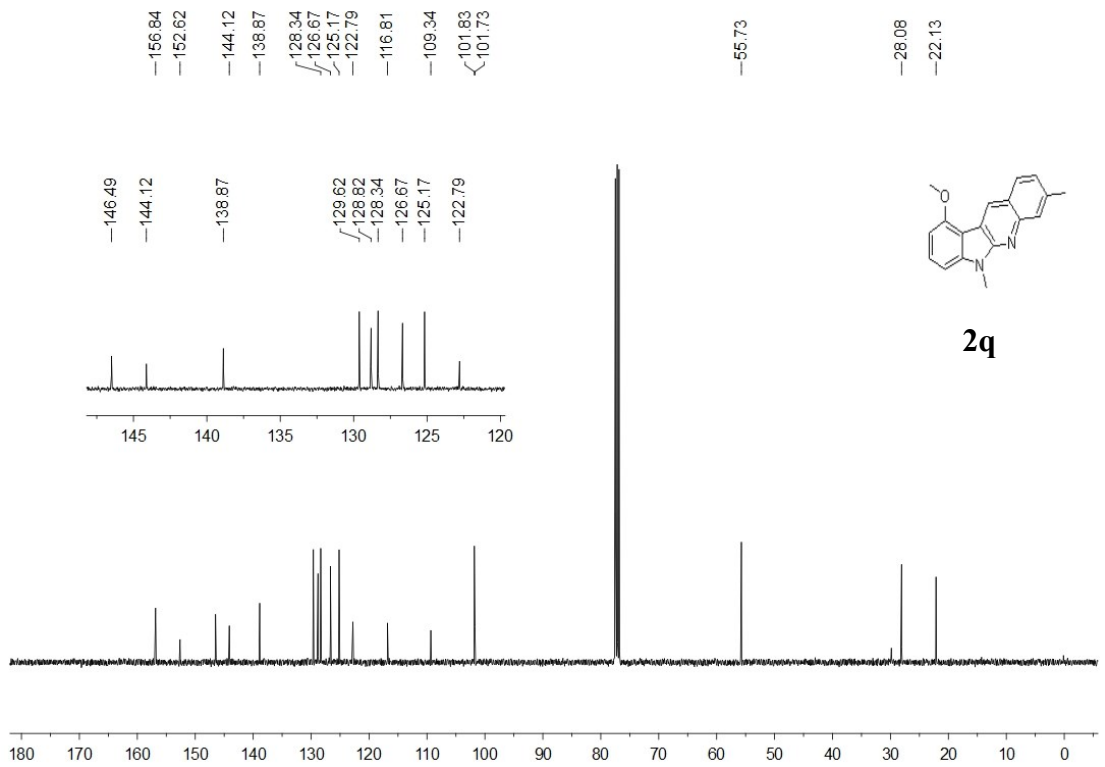

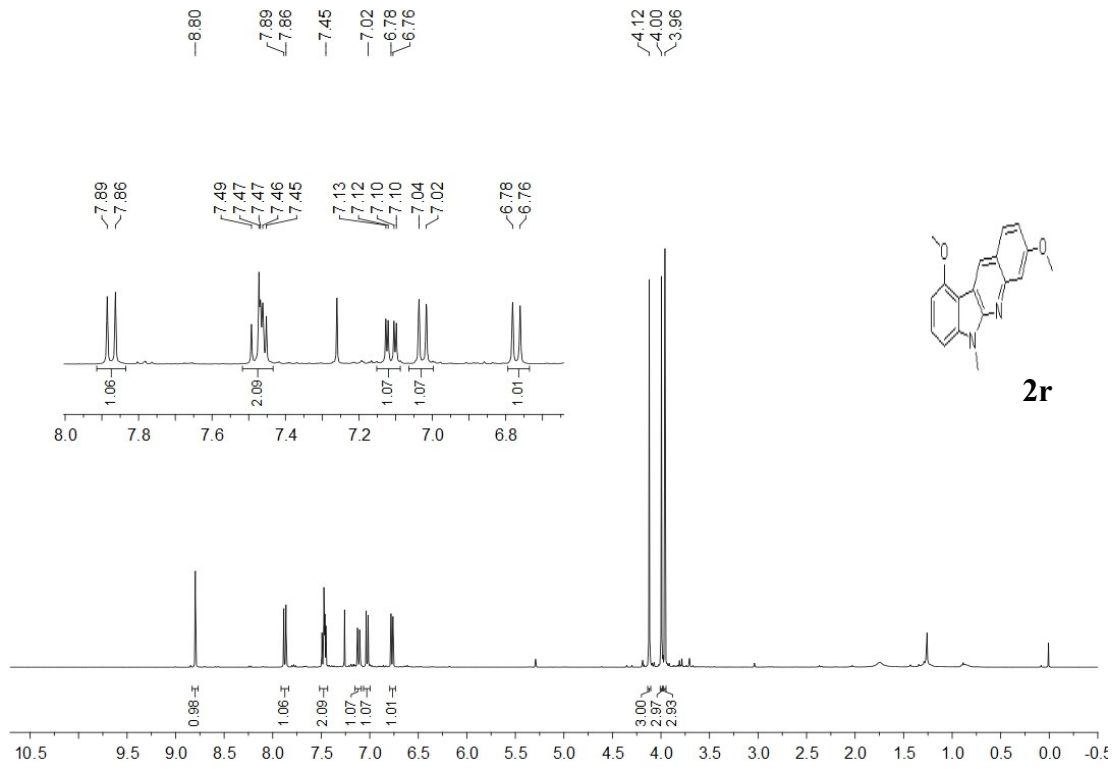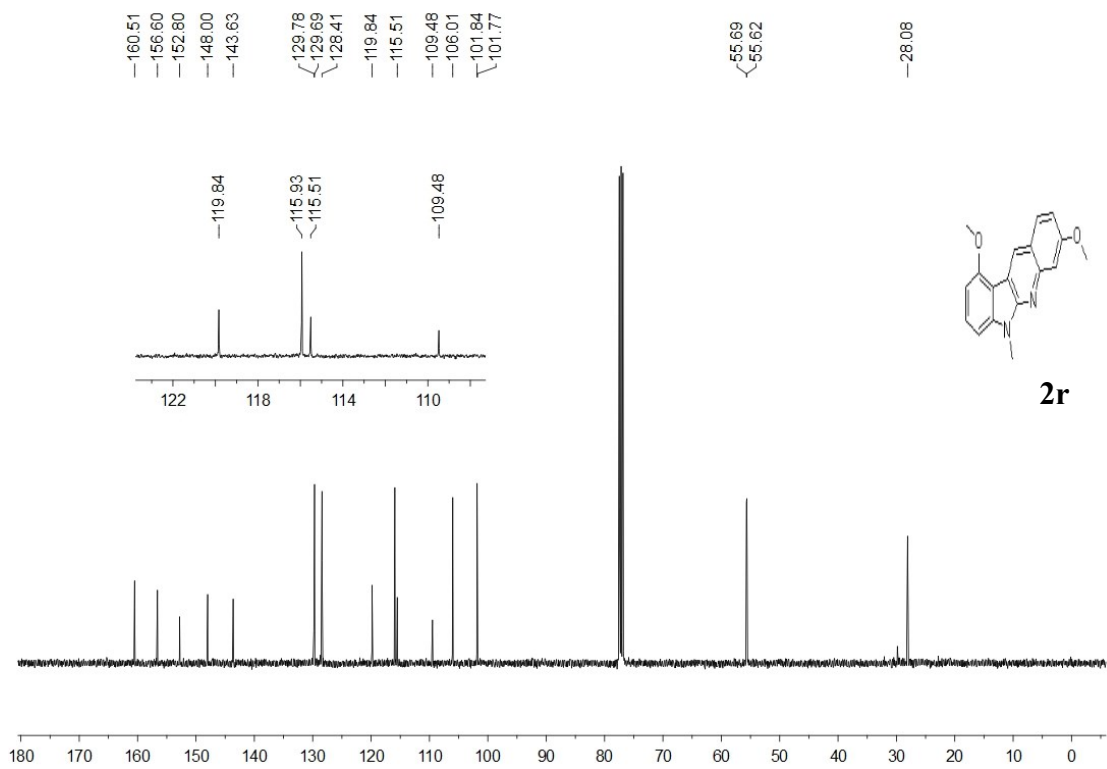

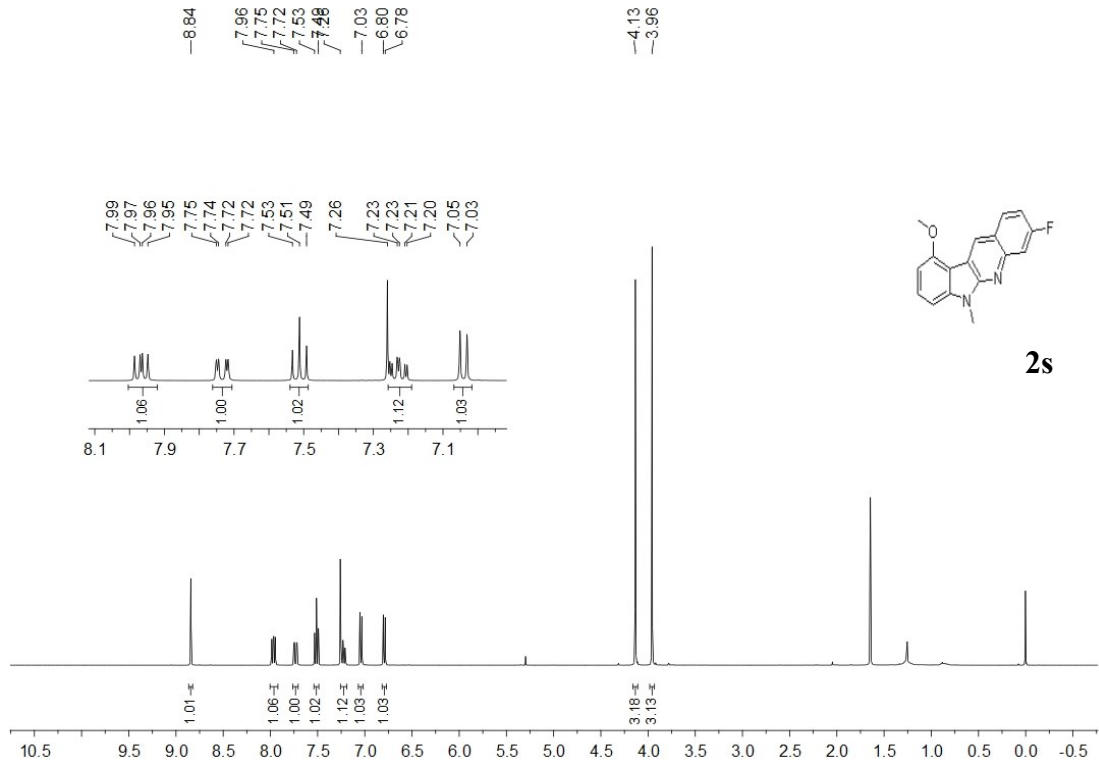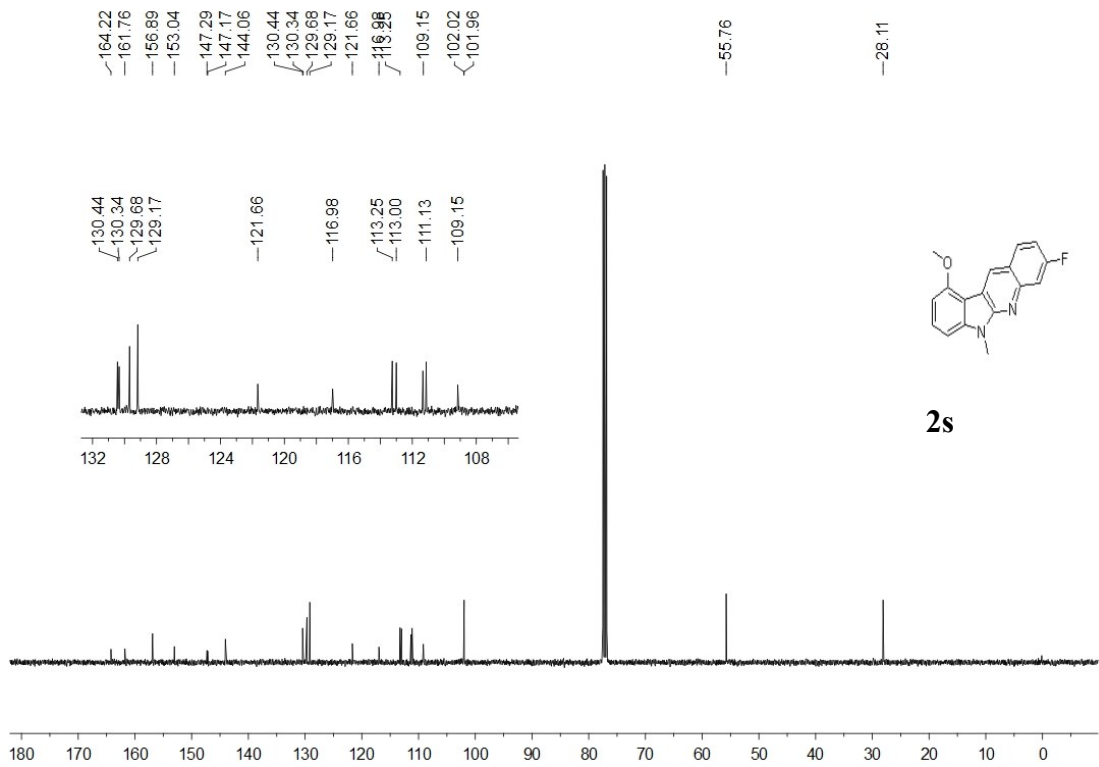



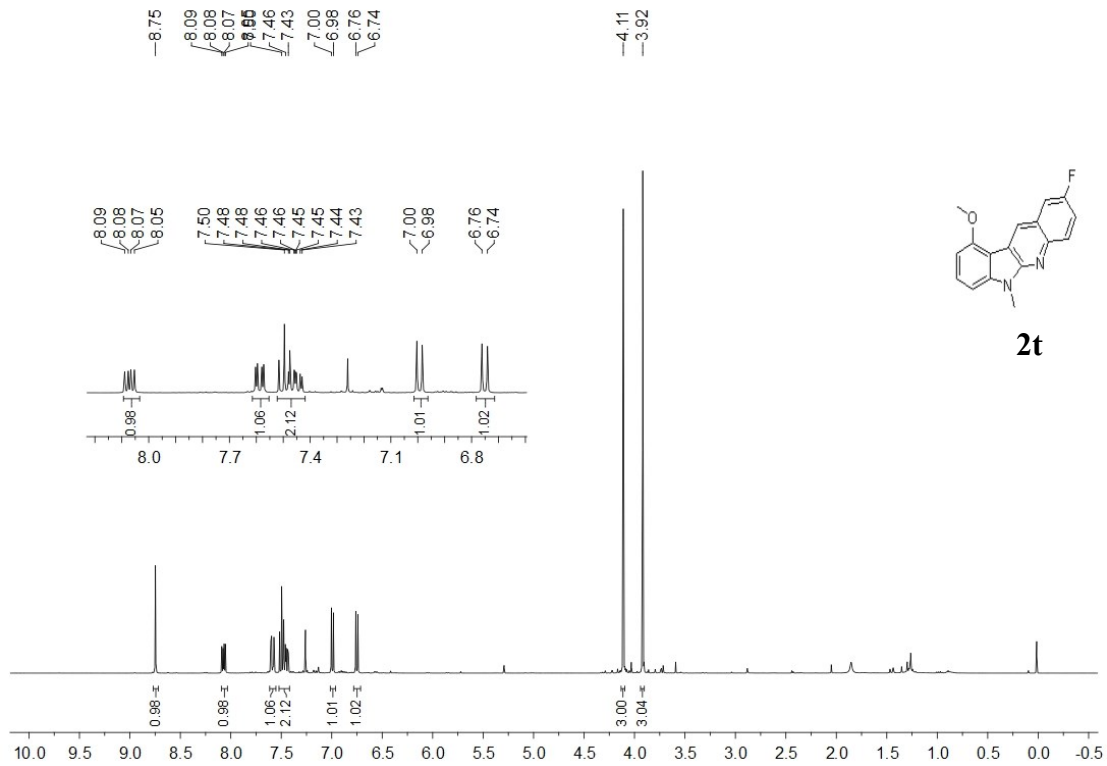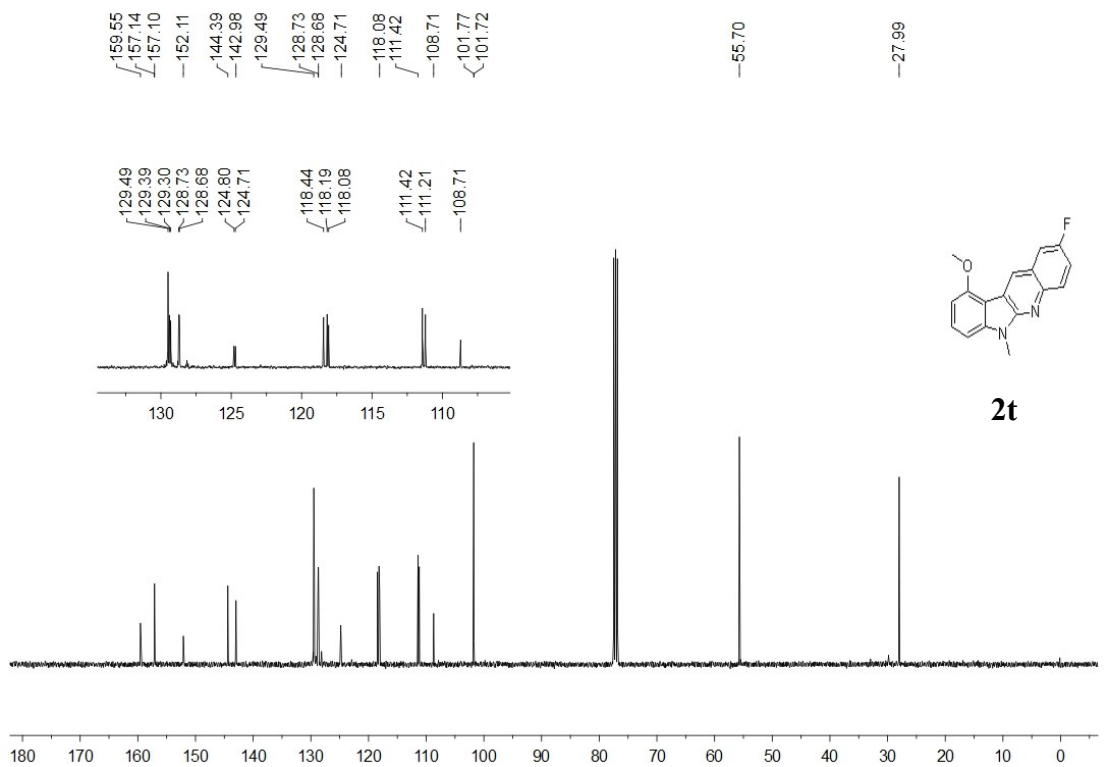

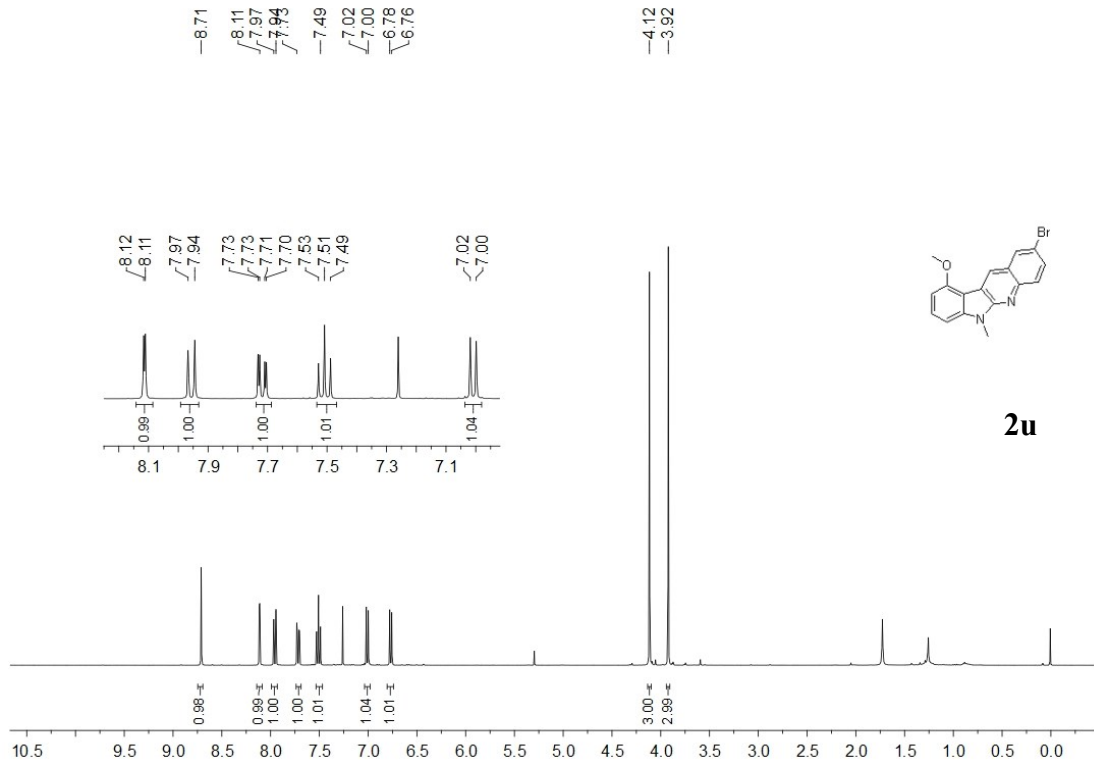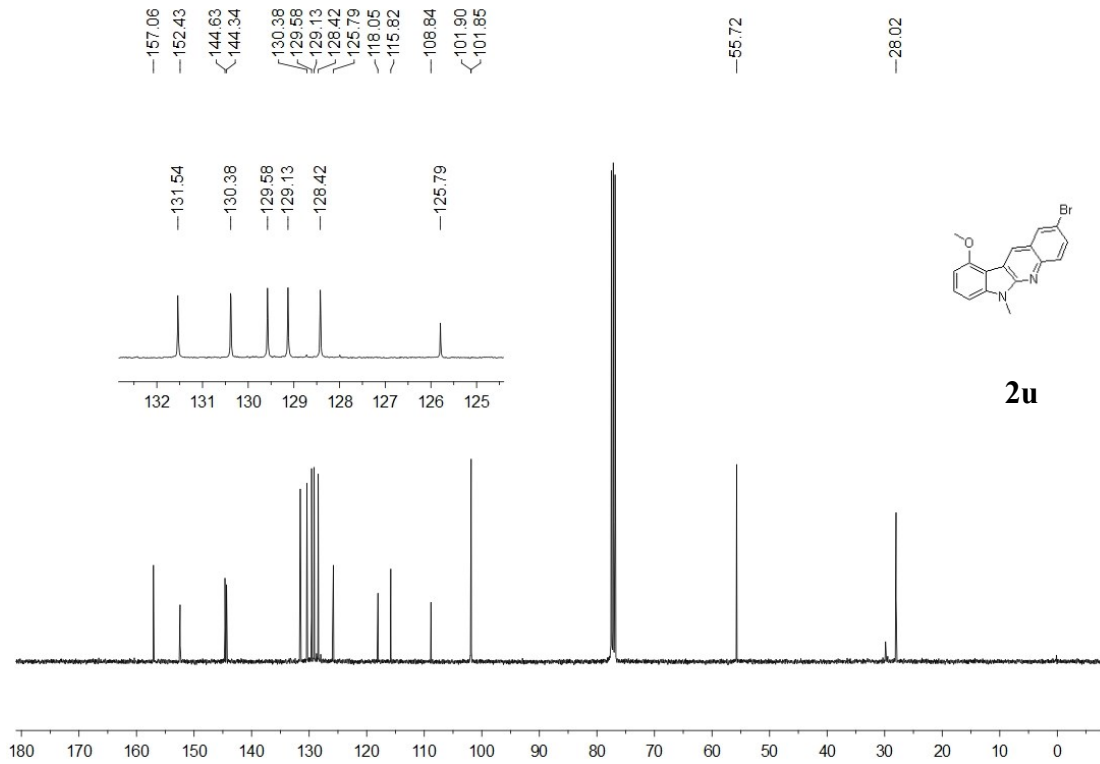

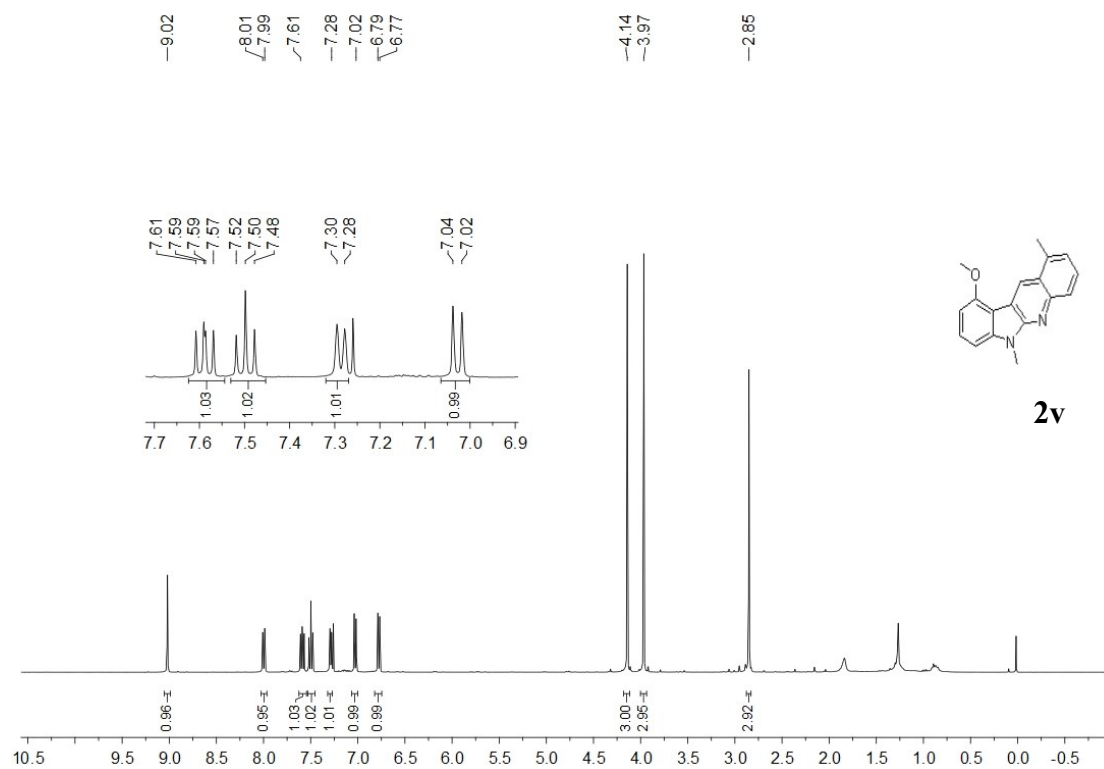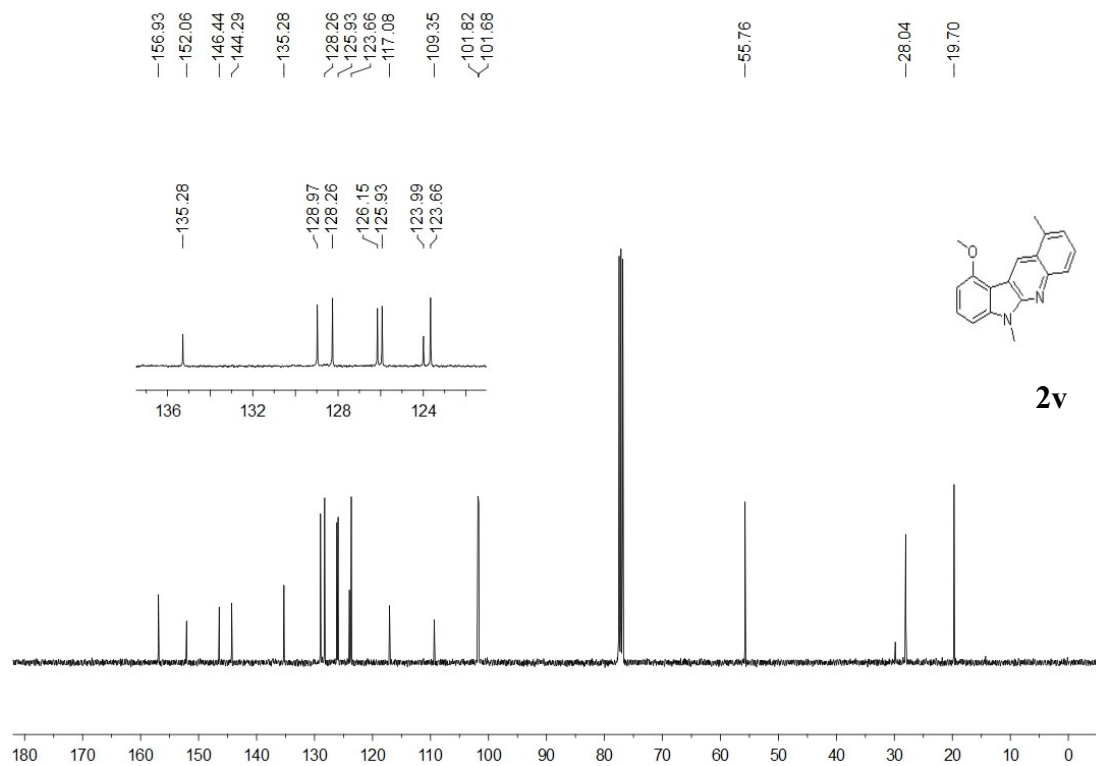

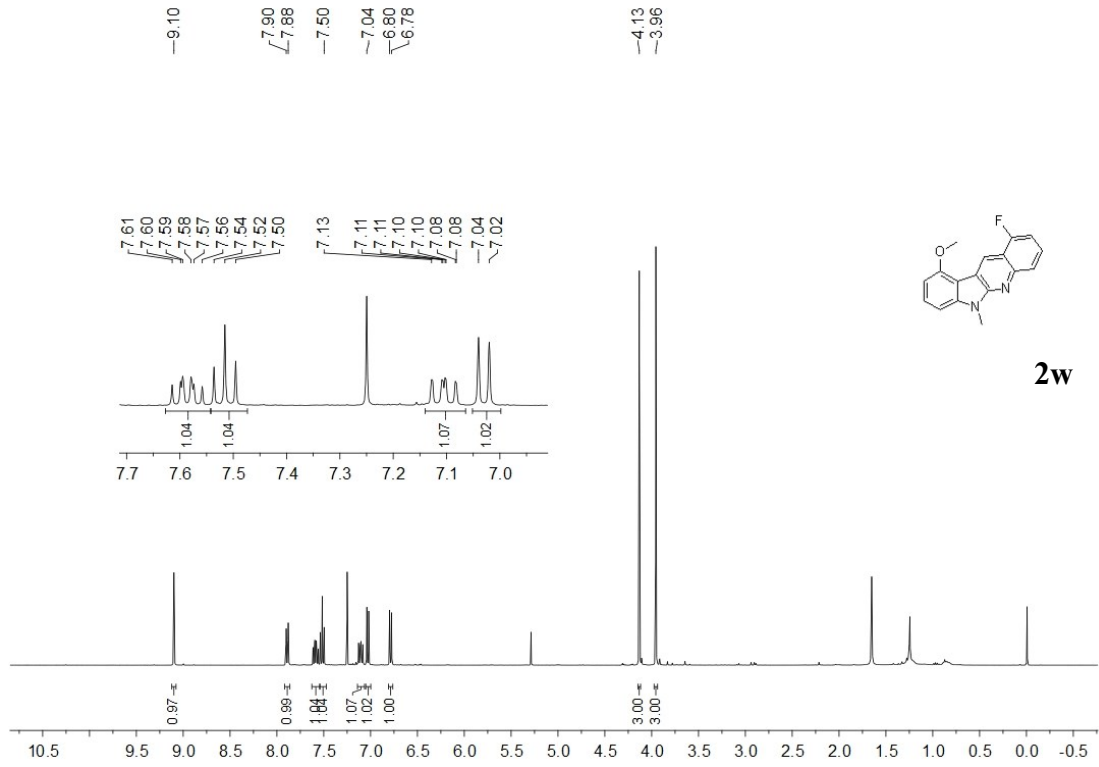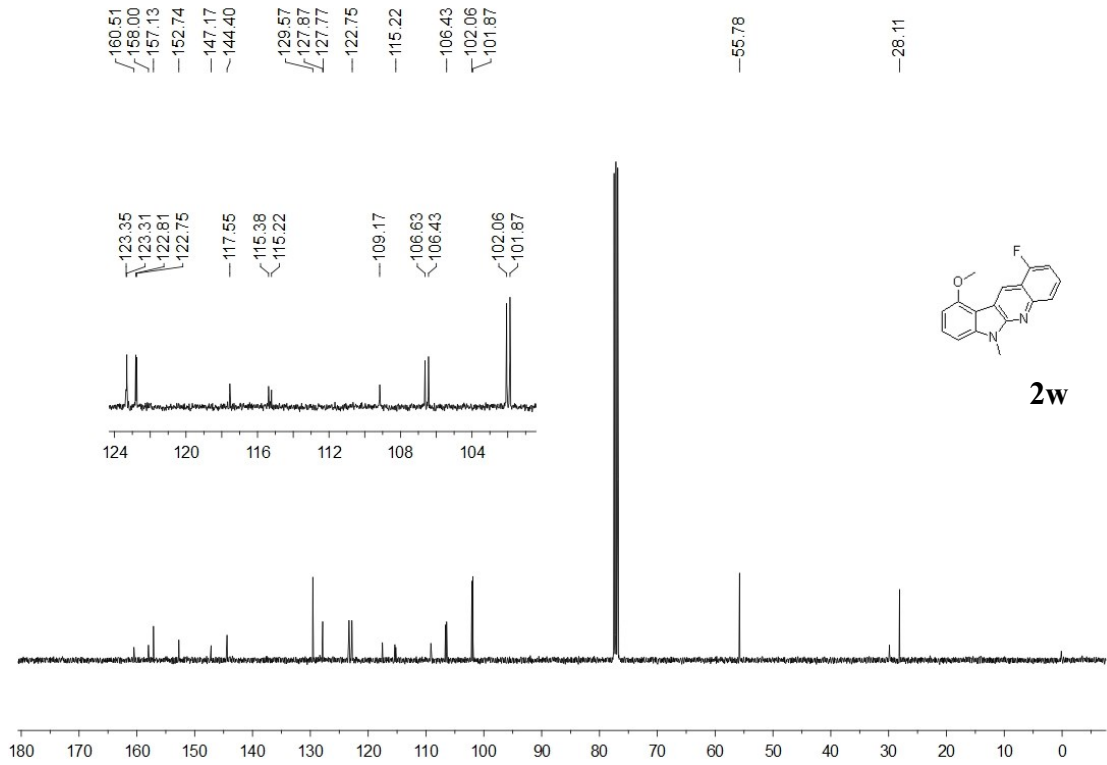

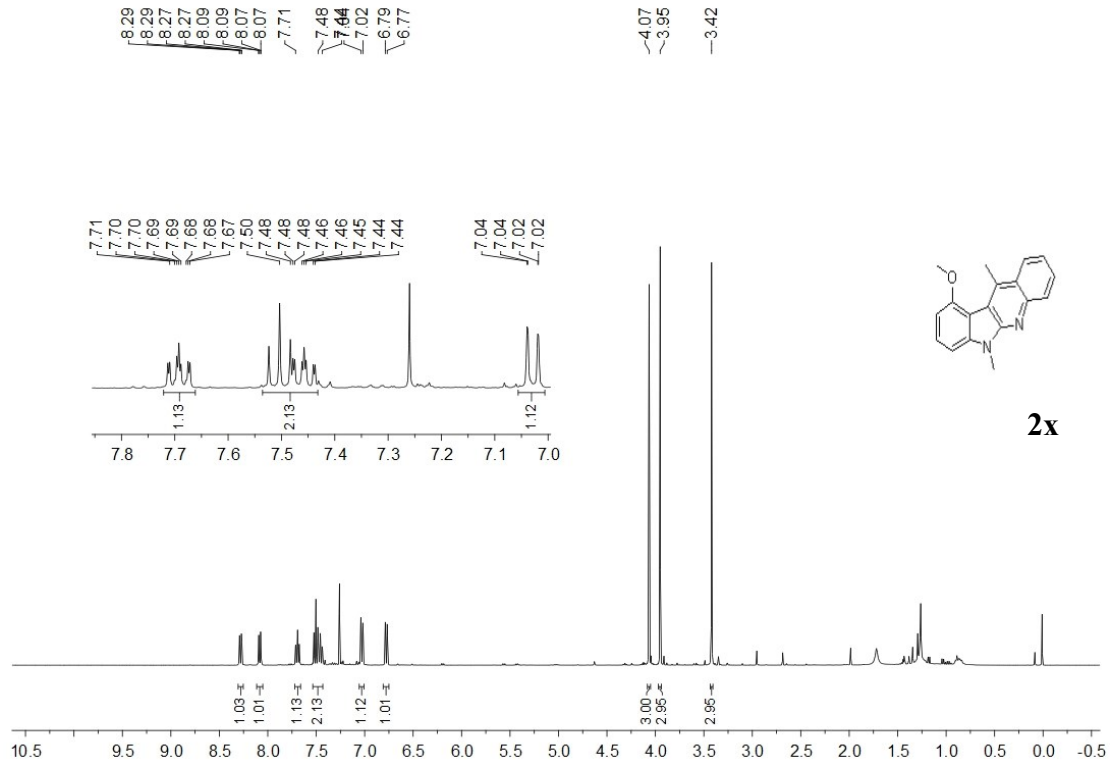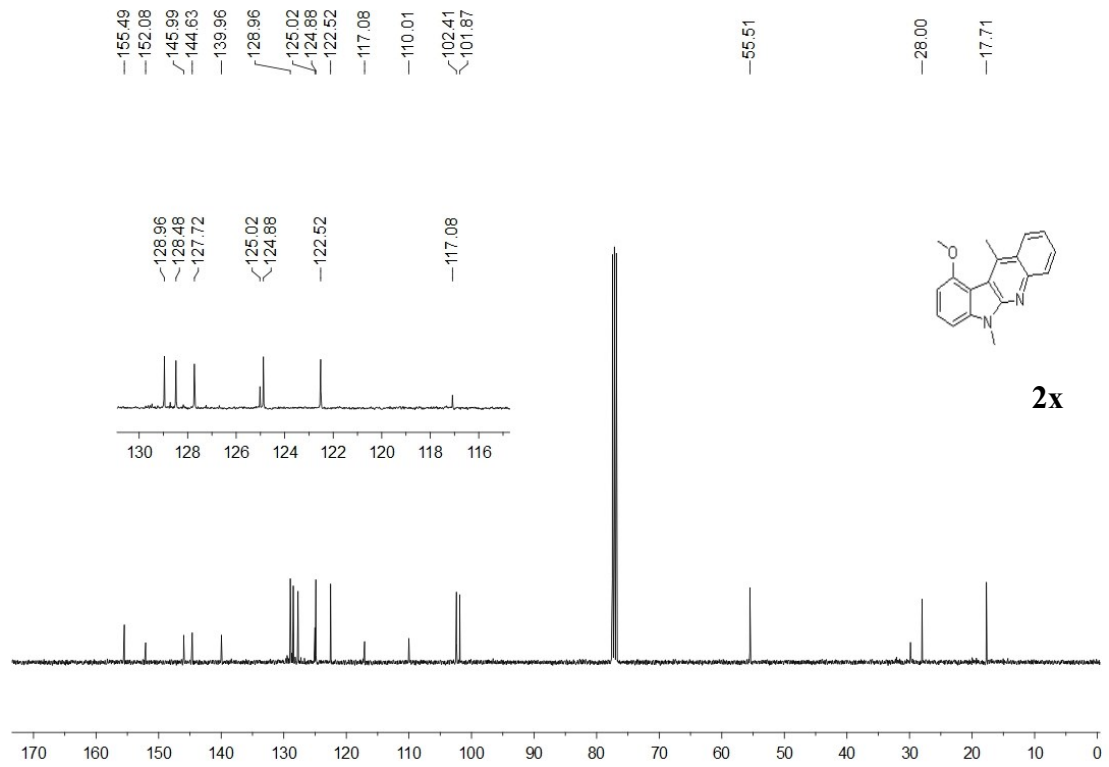

Supplement: d1ra01894a1.pdf [file d1ra01894a1.pdf]
